# Supplementary material for: Copper(i)-catalyzed amidation reaction of organoboronic esters and isocyanates
Source: Royal Society of Chemistry journal article supplement (doi:10.1039/c5gc01374g), 2015-01-01

## **Supporting Information**

### **Copper(I)-Catalyzed Amidation Reaction of Organoboronic Esters and Isocyanates**

Tedrick Thomas Salim Lew, Diane Shu Wen Lim, Yugen Zhang\*

Institute of Bioengineering and Nanotechnology  
31 Biopolis Way, The Nanos  
Singapore 138669  
E-mail: [ygzhang@ibn.a-star.edu.sg](mailto:ygzhang@ibn.a-star.edu.sg)

#### **Table of Contents**

|                                                                             |    |
|-----------------------------------------------------------------------------|----|
| General information                                                         | S2 |
| General procedures for arylboronate esters synthesis and amidation reaction | S2 |
| Table S1 - Organoboron substrate scope                                      | S3 |
| Characterization data for amide products                                    | S3 |
| NMR Spectra                                                                 | S8 |

## General Information

All anhydrous solvents were purchased from Sigma-Aldrich and used without further purification. Arylboronate esters were prepared from the corresponding arylboronic acids according to reported procedures<sup>1,2</sup> and other reagents were purchased and used as received. All reactions were carried out under argon atmosphere unless otherwise stated. Analytical thin layer chromatography (TLC) was performed using Merck 60 F-254 silica gel plates. Gas chromatography-mass spectrometry (GC-MS) analyses were performed with Shimadzu GC-2010 coupled with GCMS-QP2010. High resolution mass spectra (HRMS) were recorded on a Bruker micrOTOF-QII spectrometer. <sup>1</sup>H and <sup>13</sup>C NMR spectra were recorded on Bruker AV-400 (400 MHz) spectrometer. Chemical shifts ( $\delta$ ) are reported in parts per million (ppm) with the residual solvent peak of tetramethylsilane used as the internal standard at 0.00 ppm. <sup>1</sup>H NMR data are reported in the following order: chemical shift, multiplicity (br = broad, s = singlet, d = doublet, t = triplet, q = quartet and m = multiplet), coupling constants ( $J$ , Hz), integration and assignment. NMR yields were determined by using 1,3,5-trimethoxybenzene as internal standard. Isolated yields were determined after purification of the crude product by flash column chromatography.

### General procedure for the preparation of arylboronate esters<sup>1,2</sup>

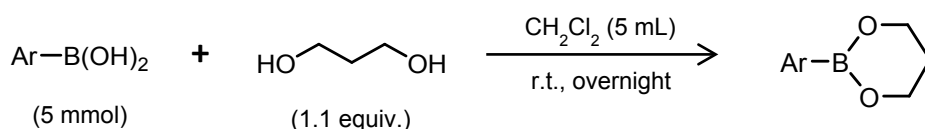

A 20 mL headspace vial was charged with arylboronic acid (5 mmol), 1,3-propanediol (5.5 mmol) and  $\text{CH}_2\text{Cl}_2$  (5 mL). The reaction mixture was stirred overnight at room temperature and the progress of the reaction was monitored by TLC. The crude reaction mixture was dried over anhydrous  $\text{Na}_2\text{SO}_4$ , filtered and evaporated to dryness. The residue was then purified by flash column chromatography (hexane/EtOAc) to give the pure product.

### General procedure for amidation reaction

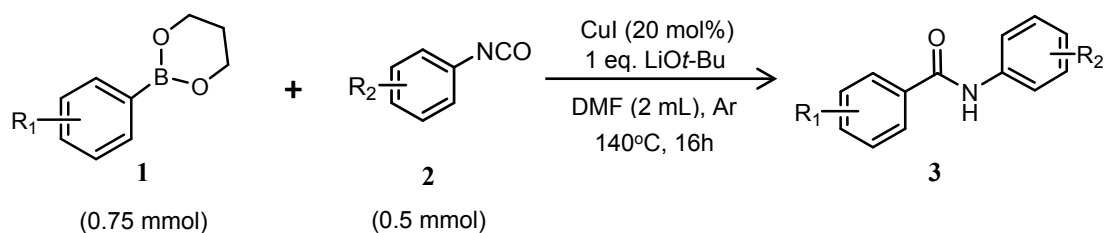

To a 20 mL headspace vial was added arylboronate ester **1** (0.75 mmol, 1.5 equiv.), CuI (19 mg, 20 mol% Cu), LiOt-Bu (40 mg, 0.5 mmol, 1 equiv.) and anhydrous DMF (2.0 mL) under an argon atmosphere. After the reaction vial was sealed with PTFE/silicone septa, a solution of isocyanate **2** (0.5 mmol, 1 equiv.) was injected using a microsyringe and the reaction mixture was stirred at 140°C for 16 hours. The progress of the reaction was monitored by GC-MS. Upon completion, the reaction was allowed to cool to room temperature before a saturated solution of  $\text{NH}_4\text{Cl}$  (10 mL) was added. The mixture was then extracted with diethyl ether (3 x 15 mL). The combined organic layers were dried over anhydrous  $\text{Na}_2\text{SO}_4$  and filtered. The solvent was removed under reduced pressure and the residue was purified by flash column chromatography to afford the corresponding amide product **3**.

**Table S1:** Substrate scope of organoboron reagents for Cu-catalyzed amidation reaction.<sup>[a,b]</sup>

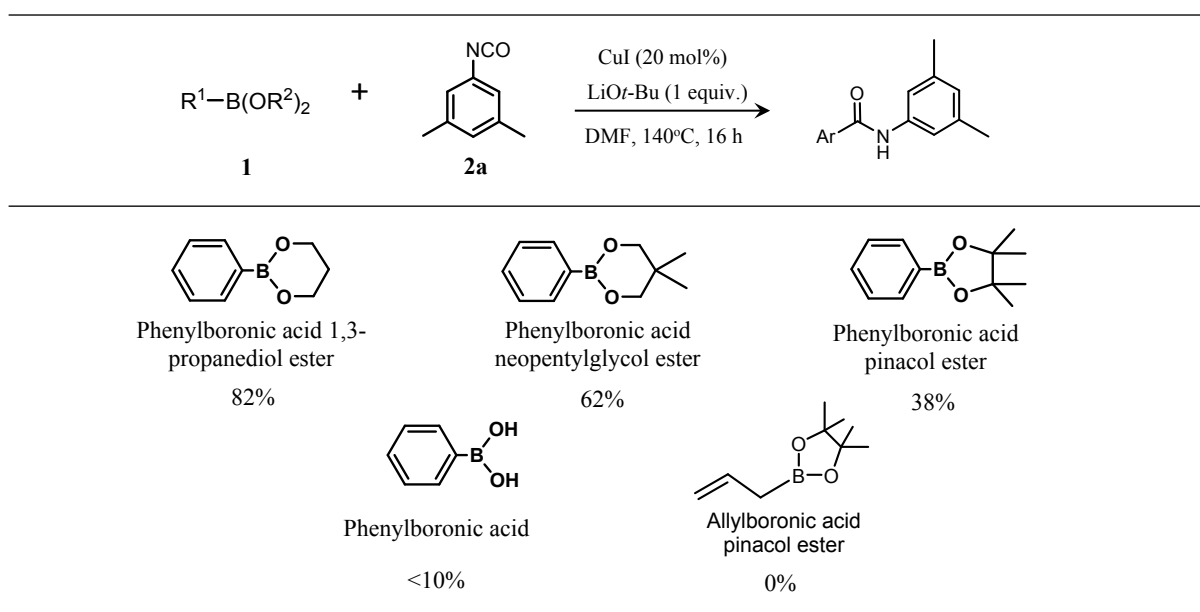

[a] Conditions: **1** (0.75 mmol), **2a** (0.5 mmol), CuI (20 mol%), LiOt-Bu (0.5 mmol), DMF (2 mL), 140°C, 16 h, Ar atmosphere, unless otherwise noted. [b] Yields determined by <sup>1</sup>H NMR spectroscopy using 1,3,5-trimethoxybenzene as internal standard.

**Gram scale synthesis:** The reaction between organoboronic ester **1a** and isocyanate **2a** was also scaled up to investigate the scalability of our protocol. Under the optimized reaction conditions, amide **3a** was furnished in excellent yield on a 6 mmol scale, demonstrating the synthetic utility and efficiency of our method for the gram-scale synthesis of secondary amides.

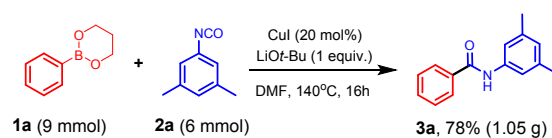

### Example of a 3-nitrophenylboronic ester substrate:

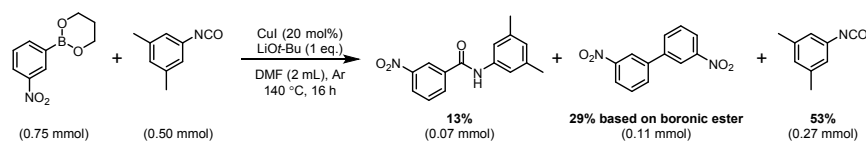

### Characterization data for amide products

#### *N*-(3,5-Dimethylphenyl)benzamide (**3a**)<sup>3</sup>

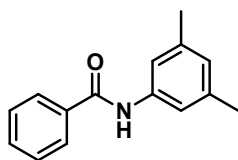

This compound was prepared according to the general procedure and isolated by column chromatography (hexanes:Et<sub>2</sub>O = 9:1-3:1 gradient elution) to give the product as a white solid (90 mg, 80%). <sup>1</sup>H NMR (400 MHz, CDCl<sub>3</sub>) δ 8.05 (br s, 1H, NH), 7.83 (d, *J* = 7.5 Hz, 2H, ArH), 7.49 (t, *J* = 7.5 Hz, 1H, ArH), 7.40 (t, *J* = 7.5 Hz, 2H, ArH), 7.27 (s, 2H, ArH), 6.76 (s, 1H, ArH), 2.27 (s, 6H, CH<sub>3</sub>); <sup>13</sup>C NMR (101 MHz, CDCl<sub>3</sub>) δ 165.9, 138.7, 137.8, 135.1, 131.7, 128.7, 127.1, 126.3, 118.2, 21.4. GC-MS: *m/z* = 225.

#### ***N*-(3,5-Dimethylphenyl)-2-methylbenzamide (3b)**

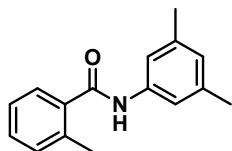

This compound was prepared according to the general procedure and isolated by column chromatography (hexanes:Et<sub>2</sub>O = 4:1) to give the product as a white solid (96 mg, 81%). <sup>1</sup>H NMR (400 MHz, CDCl<sub>3</sub>) δ 7.45-7.43 (m, 2H, ArH + NH), 7.35 (t, *J* = 7.5 Hz, 1H, ArH), 7.25-7.22 (m, 4H, ArH), 6.80 (s, 1H, ArH), 2.49 (s, 3H, CH<sub>3</sub>), 2.32 (s, 6H, CH<sub>3</sub>); <sup>13</sup>C NMR (101 MHz, CDCl<sub>3</sub>) δ 168.1, 138.9, 137.8, 136.6, 136.4, 131.3, 130.2, 126.6, 126.3, 125.9, 117.6, 21.4, 19.9. HRMS (ESI) *m/z* 240.1379 (240.1383 calcd for C<sub>16</sub>H<sub>18</sub>NO [M+H]<sup>+</sup>).

#### ***N*-(3,5-Dimethylphenyl)-2,6-dimethylbenzamide (3c)**

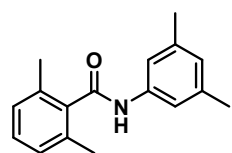

This compound was prepared according to the general procedure and isolated by column chromatography (hexanes: Et<sub>2</sub>O = 9:1) to give the product as a white solid (82 mg, 65%). <sup>1</sup>H NMR (400 MHz, CDCl<sub>3</sub>) δ 7.28-7.25 (m, 3H, ArH + NH), 7.20 (t, *J* = 7.5 Hz, 1H, ArH), 7.06 (d, *J* = 7.5 Hz, 2H, ArH), 6.81 (s, 1H, ArH), 2.38 (s, 6H, CH<sub>3</sub>), 2.33 (s, 6H, CH<sub>3</sub>); <sup>13</sup>C NMR (101 MHz, CDCl<sub>3</sub>) δ 168.5, 139.0, 137.8, 137.6, 134.4, 129.1, 127.7, 126.5, 117.6, 21.4, 19.3. HRMS (ESI) *m/z* 254.1531 (254.1539 calcd for C<sub>17</sub>H<sub>20</sub>NO [M+H]<sup>+</sup>).

#### ***N*-(3,5-Dimethylphenyl)-4-bromobenzamide (3d)**

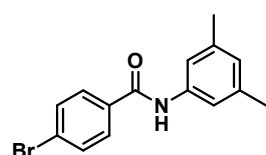

This compound was prepared according to the general procedure and isolated by column chromatography (hexanes:Et<sub>2</sub>O = 9:1) to give the product as a white solid (121 mg, 80%). <sup>1</sup>H NMR (400 MHz, CDCl<sub>3</sub>) δ 8.08 (br s, 1H, NH), 7.68 (d, *J* = 8.5 Hz, 2H, ArH), 7.51 (d, *J* = 8.5 Hz, 2H, ArH), 7.24 (s, 2H, ArH), 6.78 (s, 1H, ArH), 2.27 (s, 6H, CH<sub>3</sub>); <sup>13</sup>C NMR (101 MHz, CDCl<sub>3</sub>) δ 165.0, 138.8, 137.5, 133.9, 131.9, 128.8, 126.6, 126.4, 118.3, 21.4. HRMS (ESI) *m/z* 304.0335 (304.0332 calcd for C<sub>15</sub>H<sub>15</sub>BrNO [M+H]<sup>+</sup>).

#### ***N*-(3,5-Dimethylphenyl)-4-chlorobenzamide (3e)**

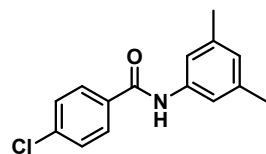

This compound was prepared according to the general procedure and isolated by column chromatography (hexanes:Et<sub>2</sub>O = 9:1) to give the product as a white solid (96 mg, 74%). <sup>1</sup>H NMR (400 MHz, CDCl<sub>3</sub>) δ 8.05 (br s, 1H, NH), 7.75 (d, *J* = 8.5 Hz, 2H, ArH), 7.36 (d, *J* = 8.5 Hz, 2H, ArH), 7.24 (s, 2H, ArH), 6.78 (s, 1H, ArH), 2.27 (s, 6H, CH<sub>3</sub>); <sup>13</sup>C NMR (101 MHz, CDCl<sub>3</sub>) δ 164.9, 138.8, 138.0, 137.5, 133.4, 128.9, 128.6, 126.6, 118.3, 21.4. HRMS (ESI) *m/z* 260.0828 (260.0837 calcd for C<sub>15</sub>H<sub>15</sub>ClNO [M+H]<sup>+</sup>).

#### ***N*-(3,5-Dimethylphenyl)-4-iodobenzamide (3f)**

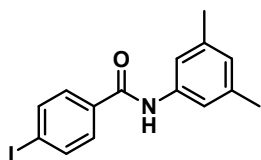

This compound was prepared according to the general procedure and isolated by column chromatography (hexanes:Et<sub>2</sub>O = 9:1) to give the product as a white solid (96 mg, 55%). <sup>1</sup>H NMR (400 MHz, CDCl<sub>3</sub>) δ 7.82 (d, *J* = 8.5 Hz, 2H, ArH), 7.76 (br s, 1H, NH), 7.57 (d, *J* = 8.5 Hz, 2H, ArH), 7.26 (s, 2H, ArH), 6.81 (s, 1H, ArH), 2.32 (s, 6H, CH<sub>3</sub>); <sup>13</sup>C NMR (101 MHz, CDCl<sub>3</sub>) δ 164.9, 138.9, 138.0, 137.5, 134.5, 128.6, 126.6, 118.3, 98.8, 21.4. HRMS (ESI) *m/z* 352.0194 (352.0193 calcd for C<sub>15</sub>H<sub>15</sub>INO [M+H]<sup>+</sup>).

#### ***N*-(3,5-Dimethylphenyl)-4-methoxybenzamide (3g)**

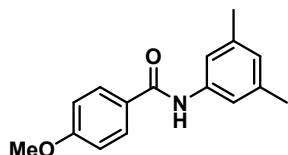

This compound was prepared according to the general procedure and isolated by column chromatography (hexanes:EtOAc = 4:1) to give the product as a white solid (89 mg, 70%). <sup>1</sup>H NMR (400 MHz, CDCl<sub>3</sub>) δ 7.82 (d, *J* = 9.0 Hz, 2H, ArH), 7.75 (br s, 1H, NH), 7.27 (s, 2H, ArH), 6.95 (d, *J* = 9.0 Hz, 2H, ArH), 6.78 (s, 1H, ArH), 3.86 (s, 3H, OCH<sub>3</sub>), 2.31 (s, 6H, CH<sub>3</sub>); <sup>13</sup>C NMR (101 MHz, CDCl<sub>3</sub>) δ 165.2, 162.4, 138.8, 137.9, 128.9, 127.3, 126.1, 117.9, 113.9, 55.5, 21.4. HRMS (ESI) *m/z* 256.1330 (256.1332 calcd for C<sub>16</sub>H<sub>18</sub>NO<sub>2</sub> [M+H]<sup>+</sup>).

#### ***N*-(3,5-Dimethylphenyl)-3-cyanobenzamide (3h)**

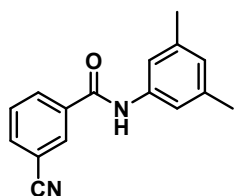

This compound was prepared according to the general procedure and isolated by column chromatography (hexanes:Et<sub>2</sub>O = 2:1) to give the product as a white solid (77 mg, 62%). <sup>1</sup>H NMR (400 MHz, CDCl<sub>3</sub>) δ 8.24 (br s, 1H, NH), 8.15 (s, 1H, ArH), 8.10 (d, *J* = 8.0 Hz, 1H, ArH), 7.78 (d, *J* = 8.0 Hz, 1H, ArH), 7.57 (t, *J* = 8.0 Hz, 1H, ArH), 7.25 (s, 2H, ArH), 6.80 (s, 1H, ArH), 2.28 (s, 6H, CH<sub>3</sub>); <sup>13</sup>C NMR (101 MHz, CDCl<sub>3</sub>) δ 163.8, 138.9, 137.2, 136.3, 134.8, 131.7, 130.9, 129.7, 127.0, 118.5, 118.1, 112.8, 21.4. HRMS (ESI) *m/z* 251.1172 (251.1179 calcd for C<sub>16</sub>H<sub>15</sub>N<sub>2</sub>O [M+H]<sup>+</sup>).

#### ***N*-(3,5-Dimethylphenyl)-4-trifluoromethyl-benzamide (3i)**

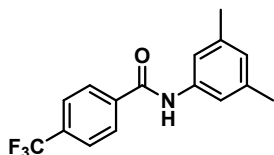

This compound was prepared according to the general procedure and isolated by column chromatography (hexanes:EtOAc = 4:1) to give the product as a white solid (102 mg, 70%). <sup>1</sup>H NMR (400 MHz, CDCl<sub>3</sub>) δ 8.03 (br s, 1H, NH), 7.93 (d, *J* = 8.0 Hz, 2H, ArH), 7.67 (d, *J* = 8.5 Hz, 2H, ArH), 7.26 (s, 2H, ArH), 6.81 (s, 1H, ArH), 2.29 (s, 6H, CH<sub>3</sub>); <sup>13</sup>C NMR (101 MHz, CDCl<sub>3</sub>) δ 164.6, 138.9, 138.3, 137.3, 133.4 (q, *J* = 33.0 Hz), 127.5, 126.8, 125.7 (q, *J* = 3.8 Hz), 123.6 (q, *J* = 272.5 Hz), 118.3, 21.4. HRMS (ESI) *m/z* 294.1105 (294.1100 calcd for C<sub>16</sub>H<sub>15</sub>F<sub>3</sub>NO [M+H]<sup>+</sup>).

#### ***N*-(3,5-Dimethylphenyl)-4-tert-butyl-benzamide (3j)**

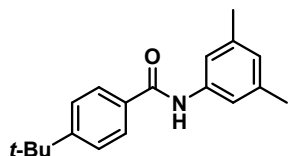

This compound was prepared according to the general procedure and isolated by column chromatography (hexanes: Et<sub>2</sub>O = 9:1) to give the product as a white solid (116 mg, 83%). <sup>1</sup>H NMR (400 MHz, CDCl<sub>3</sub>) δ 7.80-7.78 (m, 3H, ArH + NH), 7.48 (d, *J* = 8.5 Hz, 2H, ArH), 7.28 (s, 2H, ArH), 6.78 (s, 1H, ArH), 2.31 (s, 6H, CH<sub>3</sub>), 1.35 (s, 9H, C(CH<sub>3</sub>)<sub>3</sub>); <sup>13</sup>C NMR (101 MHz, CDCl<sub>3</sub>) δ 165.6, 155.3, 138.8, 137.9, 132.2, 126.9, 126.2, 125.7, 117.9, 35.0, 31.2, 21.4. HRMS (ESI) *m/z* 282.1862 (282.1852 calcd for C<sub>19</sub>H<sub>24</sub>NO [M+H]<sup>+</sup>).

### ***N*-(3,5-Dimethylphenyl)-isonicotinamide (3k)**

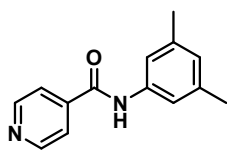

This compound was prepared according to the general procedure and isolated by column chromatography (hexanes:EtOAc = 1:1) to give the product as a white solid (81 mg, 72%). <sup>1</sup>H NMR (400 MHz, CDCl<sub>3</sub>) δ 8.77 (d, *J* = 6.0 Hz, 2H, NCHCH), 8.08 (br s, 1H, NH), 7.71 (d, *J* = 6.0 Hz, 2H, NCH), 7.29 (s, 2H, ArH), 6.85 (s, 1H, ArH), 2.34 (s, 6H, CH<sub>3</sub>); <sup>13</sup>C NMR (101 MHz, CDCl<sub>3</sub>) δ 163.7, 150.7, 142.2, 139.0, 137.1, 127.0, 120.9, 118.2, 21.4. HRMS (ESI) *m/z* 227.1178 (227.1179 calcd for C<sub>14</sub>H<sub>15</sub>N<sub>2</sub>O [M+H]<sup>+</sup>).

### ***N*-(3,5-Dimethylphenyl)-3-thiophenecarboxamide (3l)**

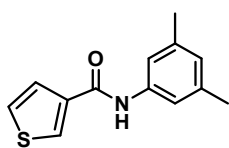

This compound was prepared according to the general procedure and isolated by column chromatography (hexanes:Et<sub>2</sub>O = 4:1) to give the product as a white solid (67 mg, 58%). <sup>1</sup>H NMR (400 MHz, CDCl<sub>3</sub>) δ 7.96 (dd, *J* = 3.0, 1.5 Hz, 1H, SCH), 7.85 (br s, 1H, NH), 7.48 (dd, *J* = 5.0, 1.5 Hz, 1H, SCH), 7.35 (dd, *J* = 5.0, 3.0 Hz, 1H, SCH), 7.24 (s, 2H, ArH), 6.77 (s, 1H, ArH), 2.28 (s, 6H, CH<sub>3</sub>); <sup>13</sup>C NMR (101 MHz, CDCl<sub>3</sub>) δ 161.3, 138.8, 137.9, 137.6, 129.7, 126.7, 126.3, 126.2, 118.2, 21.4. HRMS (ESI) *m/z* 232.0788 (232.0791 calcd for C<sub>13</sub>H<sub>14</sub>NOS [M+H]<sup>+</sup>).

### ***N*-(3,5-Dimethylphenyl)-3-phenyl-(*E*)-2-propenamide (3m)**

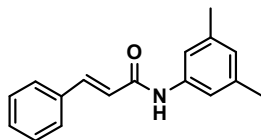

This compound was prepared according to the general procedure and isolated by column chromatography (hexanes:Et<sub>2</sub>O = 3:1) to give the product as a white solid (50 mg, 40%). <sup>1</sup>H NMR (400 MHz, CDCl<sub>3</sub>) δ 7.74 (d, *J* = 15.5 Hz, 1H, CH), 7.61 (br s, 1H, NH), 7.50-7.48 (m, 2H, ArH), 7.36-7.34 (m, 3H, ArH), 7.27-7.26 (m, 2H, ArH), 6.76 (s, 1H, ArH), 6.57 (d, *J* = 15.5 Hz, 1H, CH), 2.28 (s, 6H, CH<sub>3</sub>); <sup>13</sup>C NMR (101 MHz, CDCl<sub>3</sub>) δ 164.1, 142.2, 138.8, 137.9, 134.7, 129.9, 128.9, 128.0, 126.2, 121.1, 117.8, 21.4. HRMS (ESI) *m/z* 252.1382 (252.1383 calcd for C<sub>17</sub>H<sub>18</sub>NO [M+H]<sup>+</sup>).

### ***N*-Phenylbenzamide (3n)<sup>4</sup>**

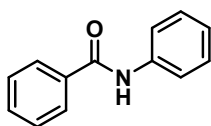

This compound was prepared according to the general procedure and isolated by column chromatography (hexanes:Et<sub>2</sub>O = 9:1-4:1 gradient elution) to give the product as a white solid (76 mg, 77%). <sup>1</sup>H NMR (400 MHz, CDCl<sub>3</sub>) δ 7.88-7.84 (m, 3H, ArH + NH), 7.65 (d, *J* = 8.0 Hz, 2H, ArH), 7.56 (t, *J* = 7.5 Hz, 1H, ArH), 7.49 (t, *J* = 7.5 Hz, 2H, ArH), 7.38 (t, *J* = 7.5 Hz, 2H, ArH), 7.16 (t, *J* = 8.0 Hz, 1H, ArH); <sup>13</sup>C NMR (101 MHz, CDCl<sub>3</sub>) δ 165.8, 137.9, 135.0, 131.9, 129.2, 128.8, 127.0, 124.6, 120.2. GC-MS: *m/z* 197.

### ***N*-(2,6-Dimethylphenyl)benzamide (3o)<sup>4</sup>**

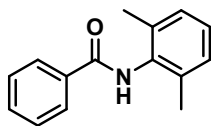

This compound was prepared according to the general procedure and isolated by column chromatography (hexanes:Et<sub>2</sub>O = 4:1) to give the product as a white solid (92 mg, 82%). <sup>1</sup>H NMR (400 MHz, CDCl<sub>3</sub>) δ 7.90-7.88 (d, *J* = 7.5 Hz, 2H, ArH), 7.57-7.53 (m, 2H, ArH + NH), 7.46 (t, *J* = 7.5 Hz, 2H, ArH), 7.16-7.09 (m, 3H, ArH), 2.25 (s, 6H, CH<sub>3</sub>); <sup>13</sup>C NMR (101 MHz, CDCl<sub>3</sub>) δ 166.0, 135.6, 134.4, 133.9, 131.8, 128.8, 128.3, 127.5, 127.3, 18.5. GC-MS: *m/z* 225.

### ***N*-(4-Methoxyphenyl)benzamide (3p)<sup>5</sup>**

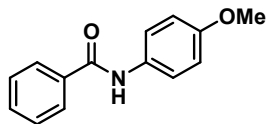

This compound was prepared according to the general procedure and isolated by column chromatography (hexanes:Et<sub>2</sub>O = 3:1) to give the product as a white solid (96 mg, 85%). <sup>1</sup>H NMR (400 MHz, CDCl<sub>3</sub>) δ 7.86-7.84 (m, 3H, ArH + NH), 7.55-7.51 (m, 3H, ArH), 7.46 (t, *J* = 7.0 Hz, 2H, ArH), 6.89 (d, *J* = 9.0 Hz, 2H, ArH), 3.81 (s, 3H, OCH<sub>3</sub>); <sup>13</sup>C NMR (101 MHz, CDCl<sub>3</sub>) δ 165.7, 156.6, 135.0, 131.7, 131.0, 128.8, 127.0, 122.2, 114.2, 55.5. GC-MS: *m/z* 227.

#### ***N*-(4-Bromo-3-methylphenyl)benzamide (3q)**

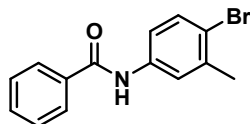

This compound was prepared according to the general procedure and isolated by column chromatography (hexanes:Et<sub>2</sub>O = 4:1) to give the product as a white solid (106 mg, 73%). <sup>1</sup>H NMR (400 MHz, CDCl<sub>3</sub>) δ 7.99 (br s, 1H, NH), 7.83 (d, *J* = 7.5 Hz, 2H, ArH), 7.57-7.52 (m, 2H, ArH), 7.47-7.43 (m, 3H, ArH), 7.32 (dd, *J* = 9.0, 2.5 Hz, 1H, ArH), 2.36 (s, 3H, CH<sub>3</sub>); <sup>13</sup>C NMR (101 MHz, CDCl<sub>3</sub>) δ 165.9, 138.7, 137.1, 134.7, 132.7, 132.0, 128.8, 127.1, 122.5, 119.8, 119.3, 23.1. HRMS (ESI) *m/z* 290.0178 (290.0175 calcd for C<sub>14</sub>H<sub>13</sub>BrNO [M+H]<sup>+</sup>).

#### ***N*-(4-Chlorophenyl)benzamide (3r)<sup>4</sup>**

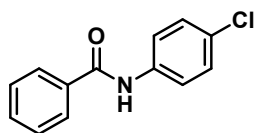

This compound was prepared according to the general procedure and isolated by column chromatography (hexanes: EtOAc = 4:1) to give the product as a white solid (81 mg, 70%). <sup>1</sup>H NMR (400 MHz, CDCl<sub>3</sub>) δ 7.87-7.84 (m, 3H, ArH + NH), 7.60 (d, *J* = 9.0 Hz, 2H, ArH), 7.57 (t, *J* = 7.5 Hz, 1H, ArH), 7.50 (t, *J* = 7.5 Hz, 2H, ArH), 7.34 (d, *J* = 9.0 Hz, 2H, ArH); <sup>13</sup>C NMR (101 MHz, CDCl<sub>3</sub>) δ 165.7, 136.5, 134.6, 132.1, 129.6, 129.2, 128.9, 127.1, 121.4. GC-MS: *m/z* 231.

#### ***N*-(4-Cyanophenyl)benzamide (3s)<sup>6</sup>**

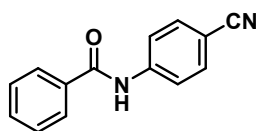

This compound was prepared according to the general procedure and isolated by column chromatography (hexanes:Et<sub>2</sub>O = 1:1) to give the product as a white solid (73 mg, 66%). <sup>1</sup>H NMR (400 MHz, CDCl<sub>3</sub>) δ 8.11 (br s, 1H, NH), 7.87 (d, *J* = 7.5 Hz, 2H, ArH), 7.81 (d, *J* = 9.0 Hz, 2H, ArH), 7.65 (d, *J* = 9.0 Hz, 2H, ArH), 7.60 (t, *J* = 7.5 Hz, 1H, ArH), 7.51 (t, *J* = 7.5 Hz, 2H, ArH); <sup>13</sup>C NMR (101 MHz, CDCl<sub>3</sub>) δ 166.0, 142.1, 134.1, 133.4, 132.5, 129.0, 127.2, 120.0, 118.9, 107.3. GC-MS: *m/z* 222.

#### ***N*-(4-Nitrophenyl)benzamide (3t)<sup>7</sup>**

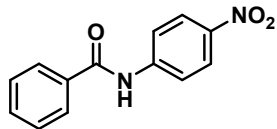

This compound was prepared according to the general procedure and isolated by column chromatography (hexanes:Et<sub>2</sub>O = 3:1) to give the product as a pale yellow solid (64 mg, 53%). <sup>1</sup>H NMR (400 MHz, d<sub>6</sub>-DMSO) δ 10.84 (br s, 1H, NH), 8.28 (d, *J* = 9.5 Hz, 2H, ArH), 8.08 (d, *J* = 9.5 Hz, 2H, ArH), 7.99 (d, *J* = 8.0 Hz, 2H, ArH), 7.63 (t, *J* = 8.0 Hz, 1H, ArH), 7.57 (t, *J* = 8.0 Hz, 2H, ArH); <sup>13</sup>C NMR (101 MHz, d<sub>6</sub>-DMSO) δ 166.8, 146.0, 142.9, 134.7, 132.7, 129.0, 128.4, 125.3, 120.3. GC-MS: *m/z* 242.

#### ***N*-(Adamantan-1-yl)benzamide (3u)**

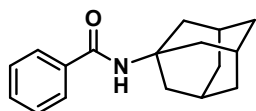

This compound was prepared according to the general procedure and isolated by column chromatography (hexanes:Et<sub>2</sub>O = 4:1) to give the product as a

white solid (99 mg, 78%). <sup>1</sup>H NMR (400 MHz, CDCl<sub>3</sub>) δ 7.71 (d, *J* = 8.0 Hz, 2H, ArH), 7.46 (t, *J* = 8.0 Hz, 1H, ArH), 7.40 (t, *J* = 8.0 Hz, 2H, ArH), 5.85 (br s, 1H, NH), 2.13 (s, 9H), 1.72 (s, 6H); <sup>13</sup>C NMR (101 MHz, CDCl<sub>3</sub>) δ 166.7, 136.0, 131.1, 128.5, 126.7, 52.3, 41.7, 36.4, 29.5. HRMS (ESI) *m/z* 256.1689 (256.1696 calcd for C<sub>17</sub>H<sub>22</sub>NO [M+H]<sup>+</sup>).

## References

1. N. Dastbaravardeh, M. Schnurch and M. D. Mihovilovic, *Org. Lett.*, **2012**, 14, 1930-1933.
2. S. Oda and H. Yamamoto, *Angew. Chem. Int. Ed.*, **2013**, 52, 8165-8168.
3. S. M. Johnson, S. Connelly, I. A. Wilson and J. W. Kelly, *J. Med. Chem.*, **2008**, 51, 6348-6358.
4. L. J. Zhang, S. P. Su, H. P. Wu and S. W. Wang, *Tetrahedron*, **2009**, 65, 10022-10024.
5. C. A. Faler and M. M. Joullie, *Tetrahedron Lett.*, **2006**, 47, 7229-7231.
6. Sasaki, K.; Crich, D., *Org. Lett.*, **2011**, 13 (9), 2256-2259.
7. Y. Wang, D. P. Zhu, L. Tang, S. J. Wang and Z. Y. Wang, *Angew. Chem. Int. Ed.*, **2011**, 50, 8917-8921.



# <sup>1</sup>H and <sup>13</sup>C NMR of Products

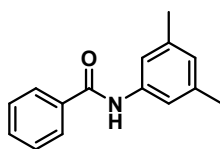

3a

<sup>1</sup>H NMR, CDCl<sub>3</sub>, 400 MHz

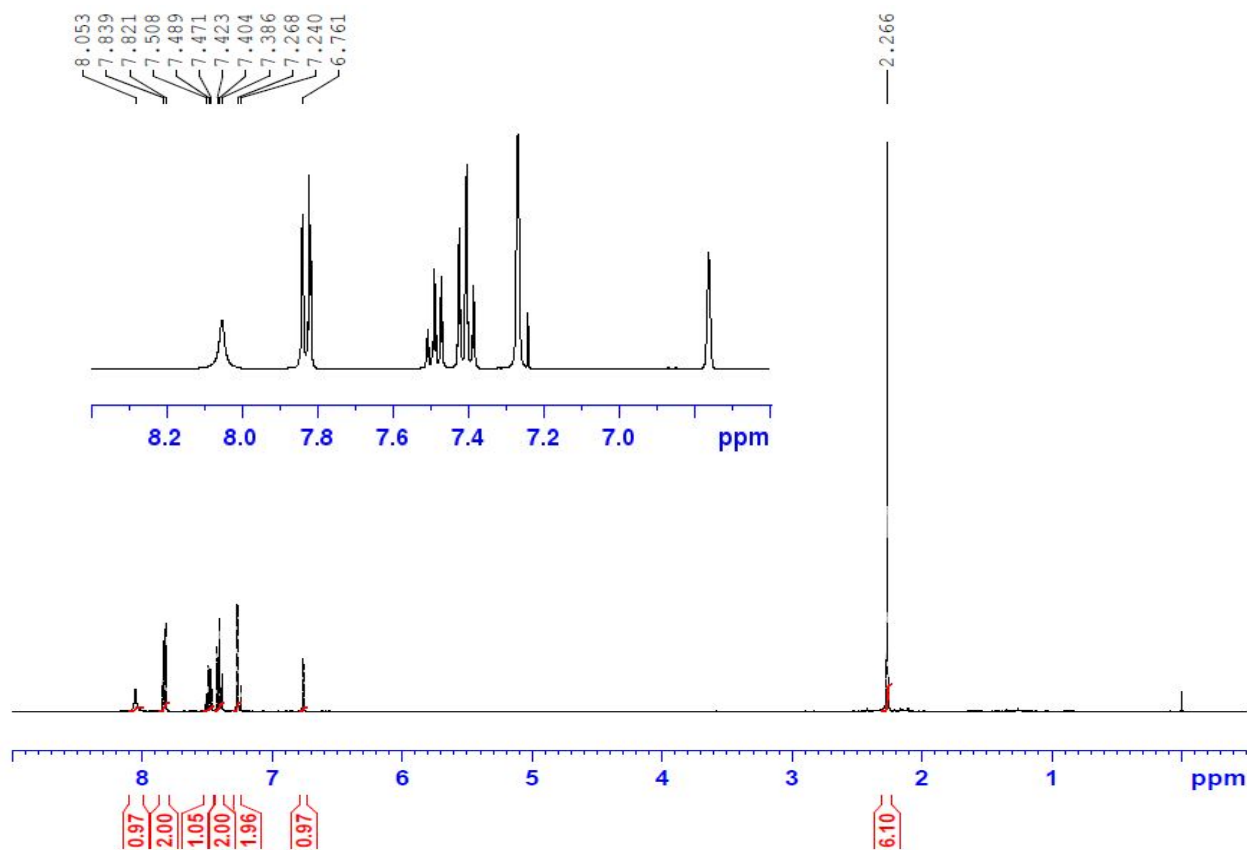

<sup>13</sup>C NMR, CDCl<sub>3</sub>, 101 MHz

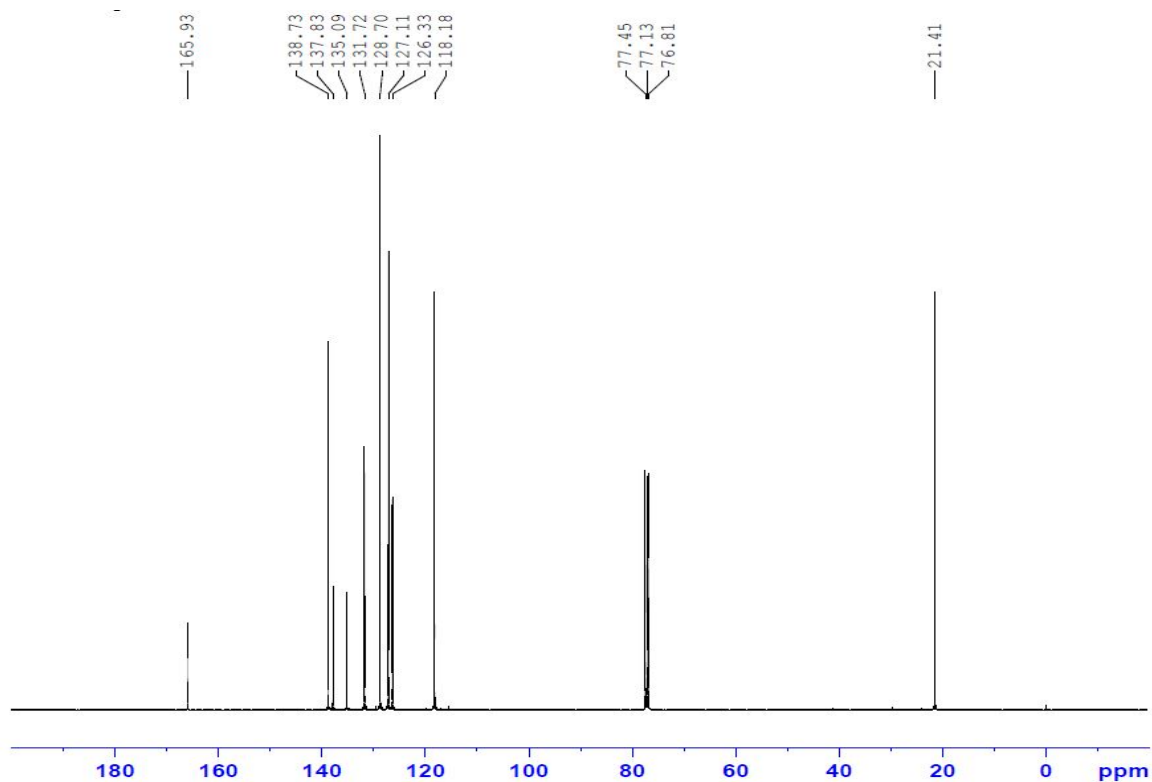

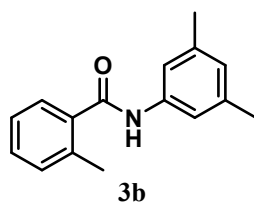

$^1\text{H}$  NMR,  $\text{CDCl}_3$ , 400 MHz

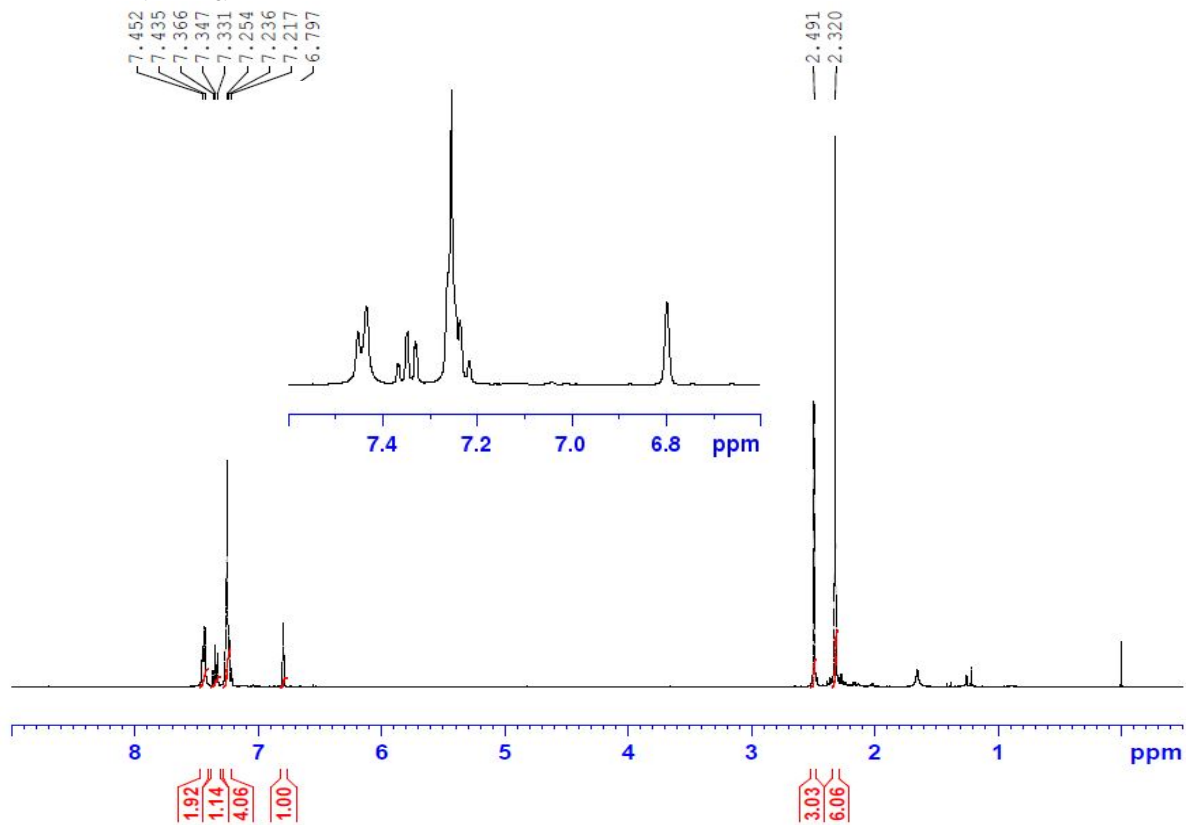

$^{13}\text{C}$  NMR,  $\text{CDCl}_3$ , 101 MHz

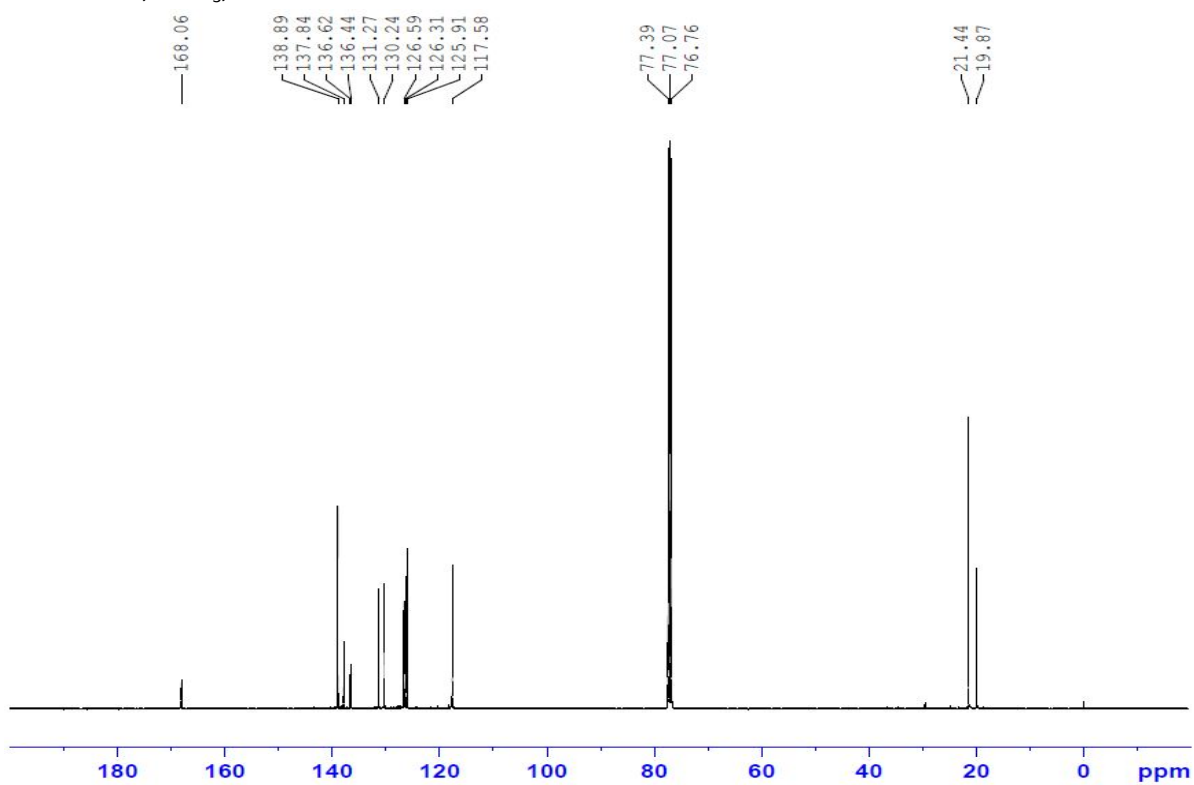

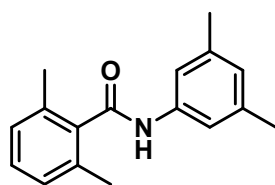

3c

$^1\text{H}$  NMR,  $\text{CDCl}_3$ , 400 MHz

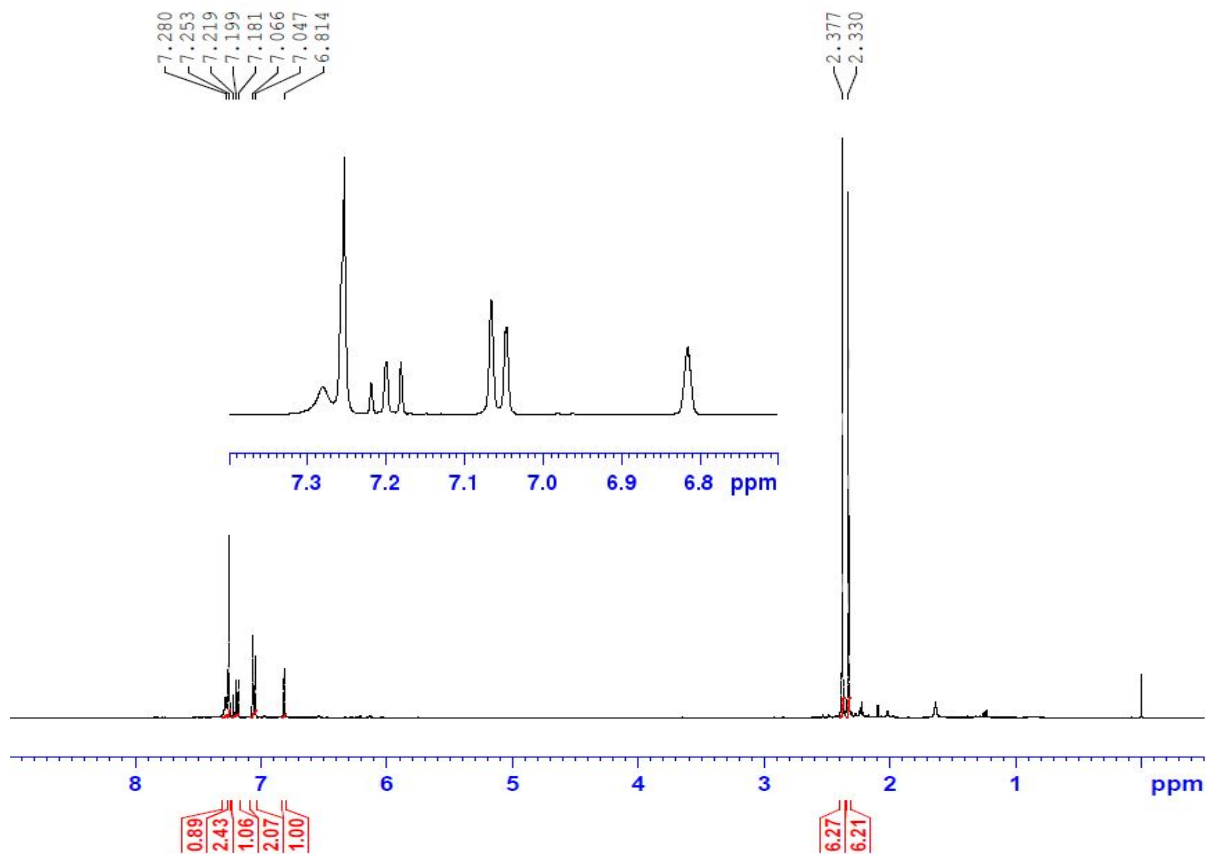

$^{13}\text{C}$  NMR,  $\text{CDCl}_3$ , 101 MHz

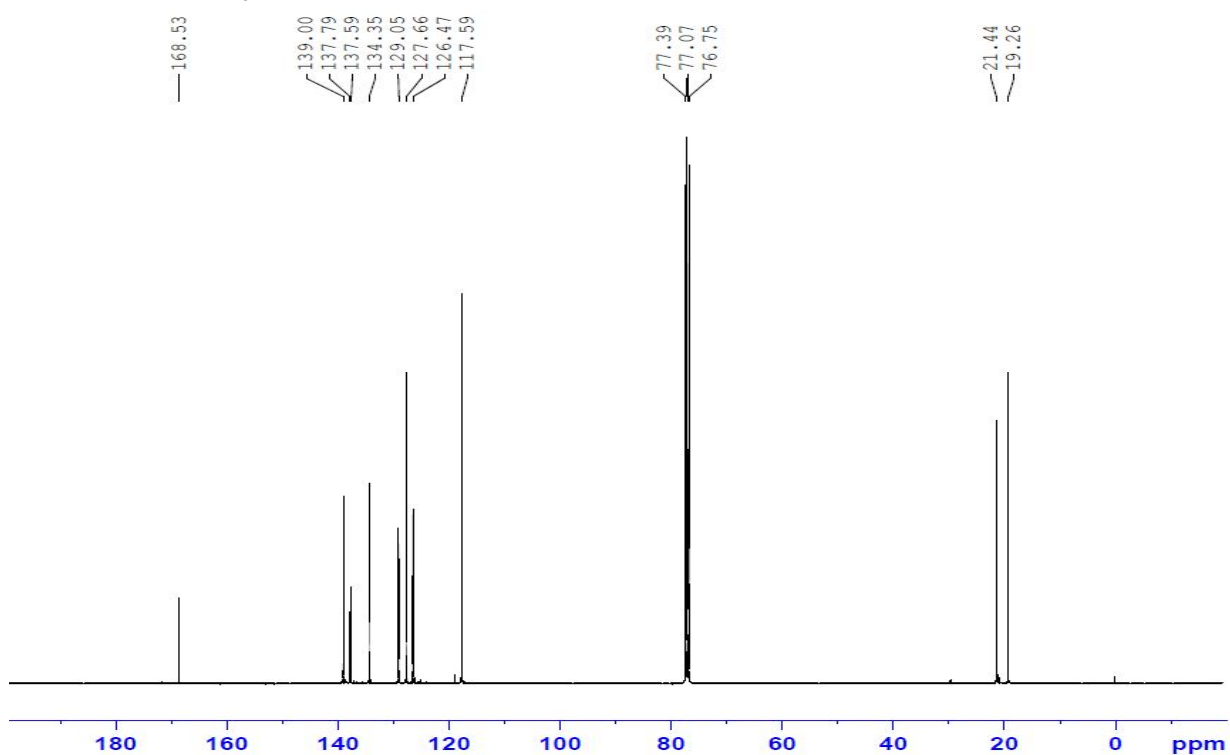

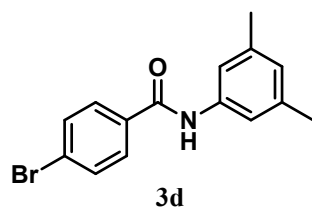

$^1\text{H}$  NMR,  $\text{CDCl}_3$ , 400 MHz

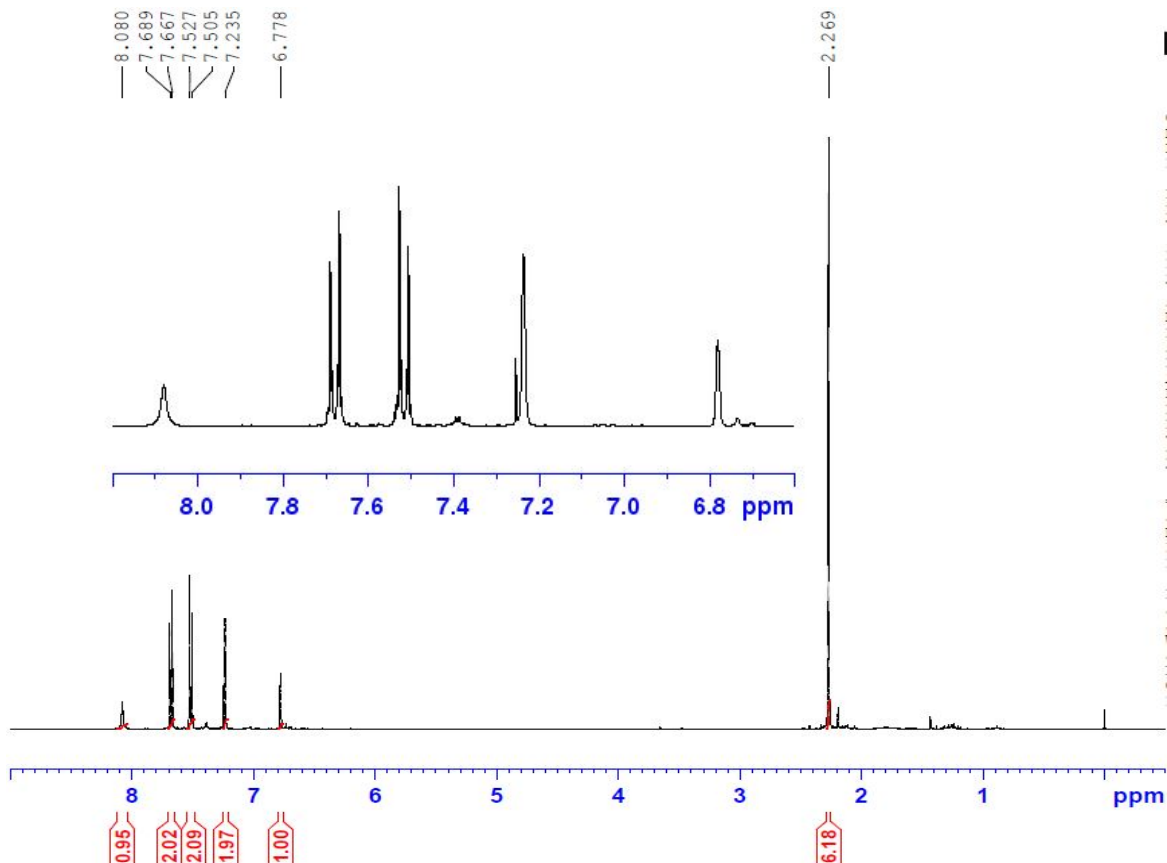

$^{13}\text{C}$  NMR,  $\text{CDCl}_3$ , 101 MHz

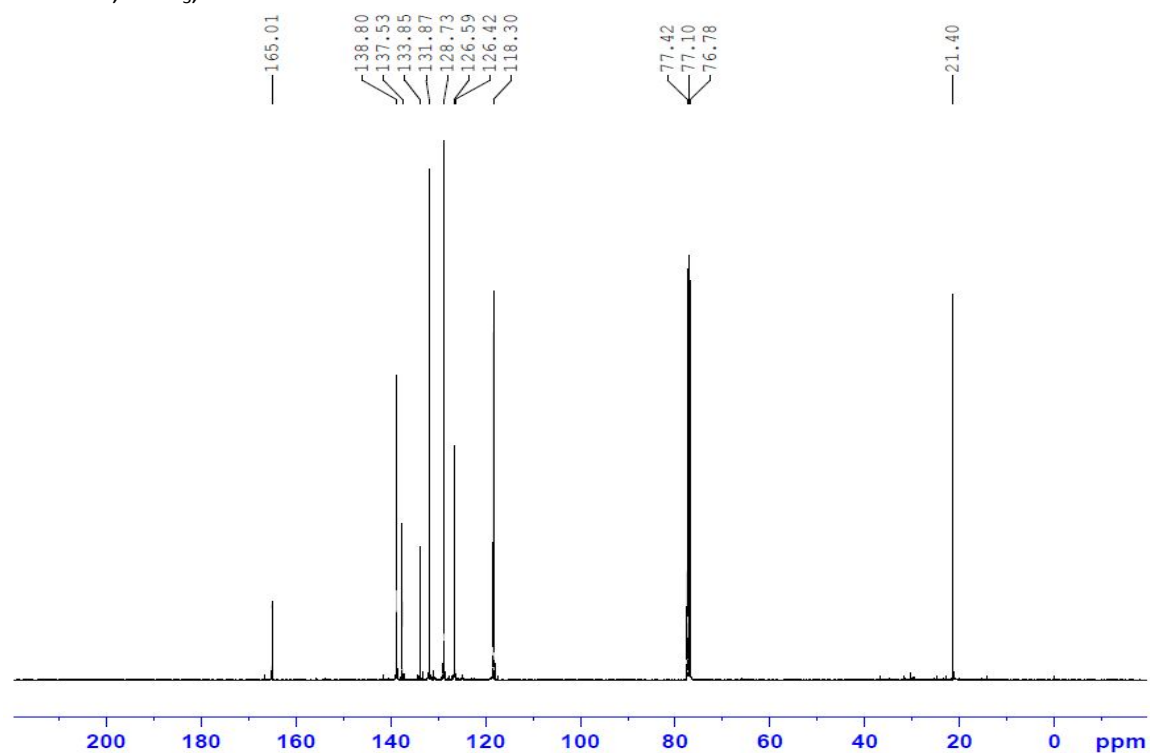

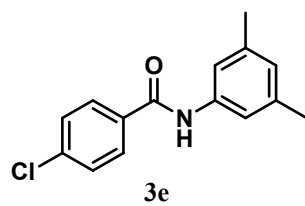

$^1\text{H}$  NMR,  $\text{CDCl}_3$ , 400 MHz

8.052  
7.764  
7.743  
7.372  
7.350  
7.235  
6.778

2.270

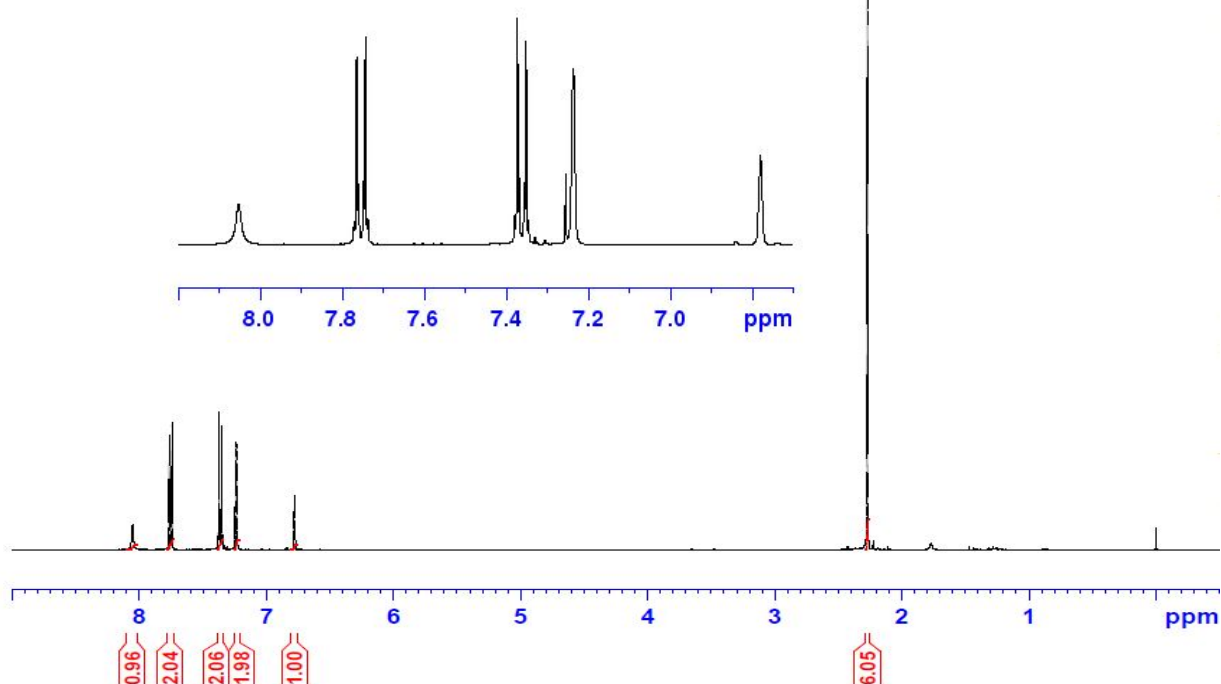

$^{13}\text{C}$  NMR,  $\text{CDCl}_3$ , 101 MHz

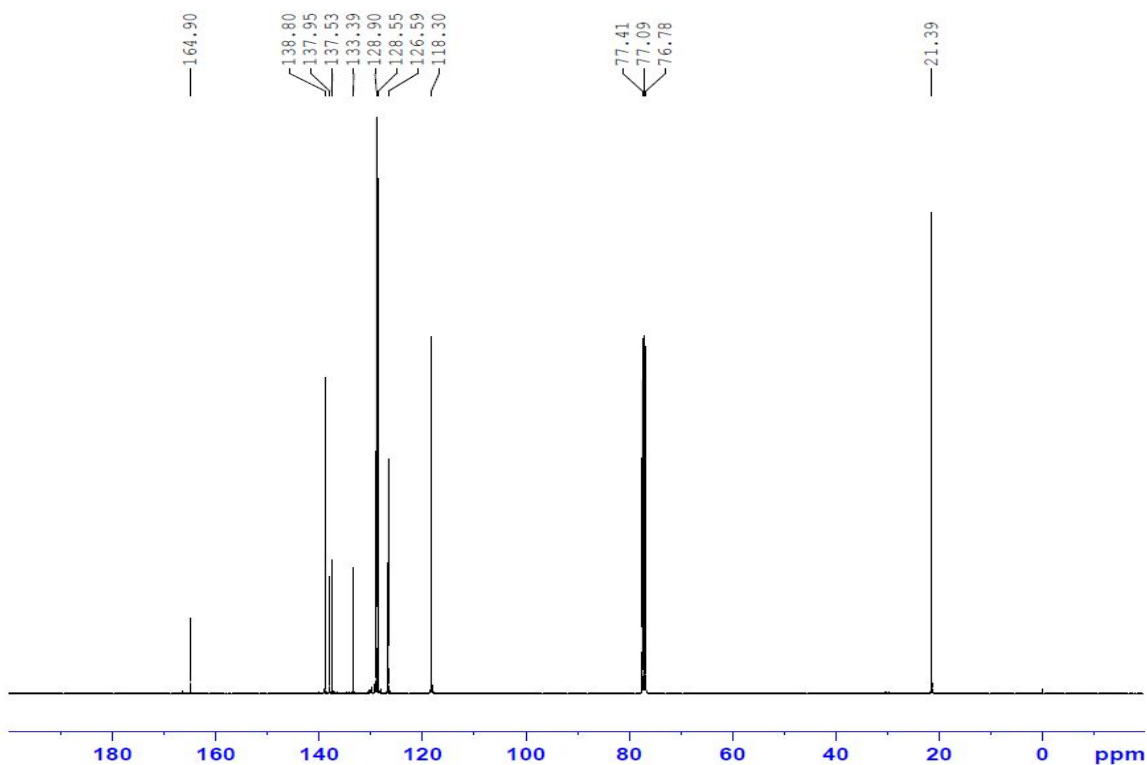

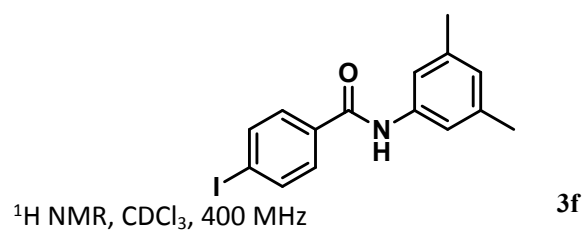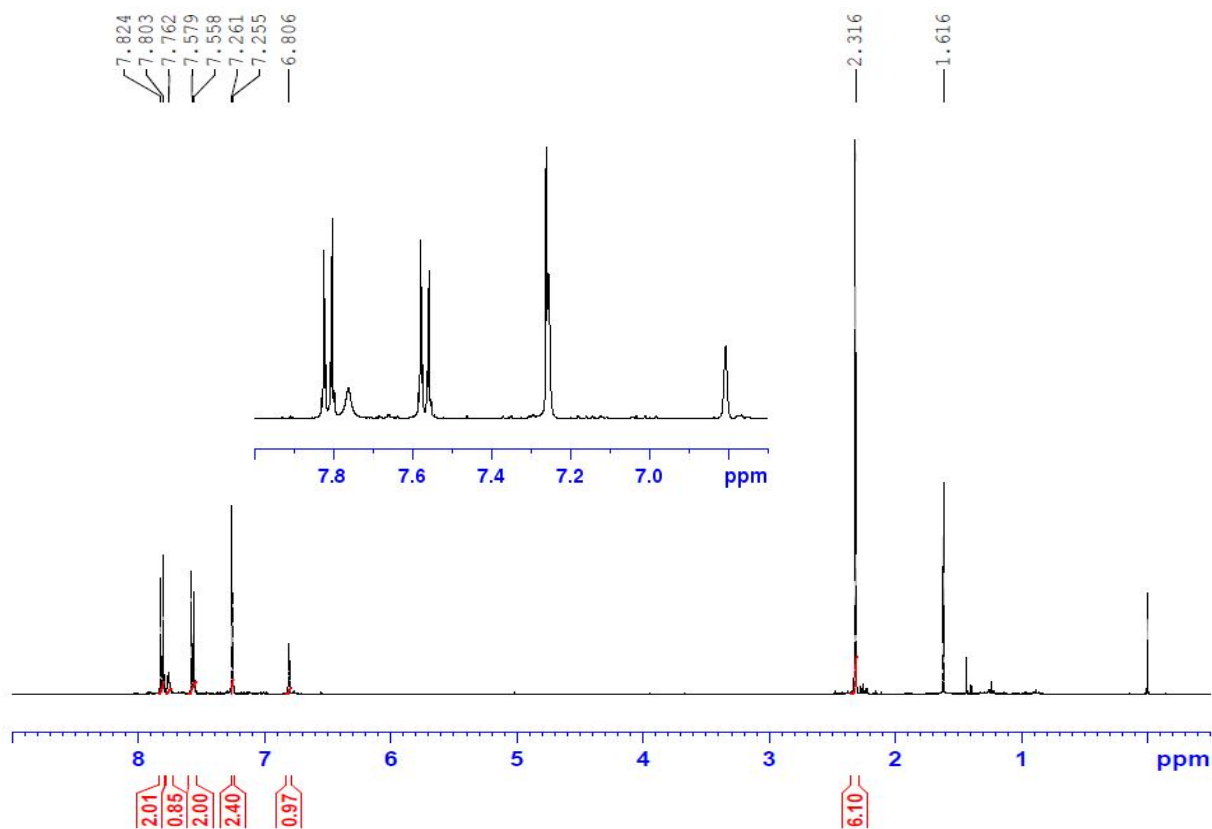

<sup>13</sup>C NMR, CDCl<sub>3</sub>, 101 MHz

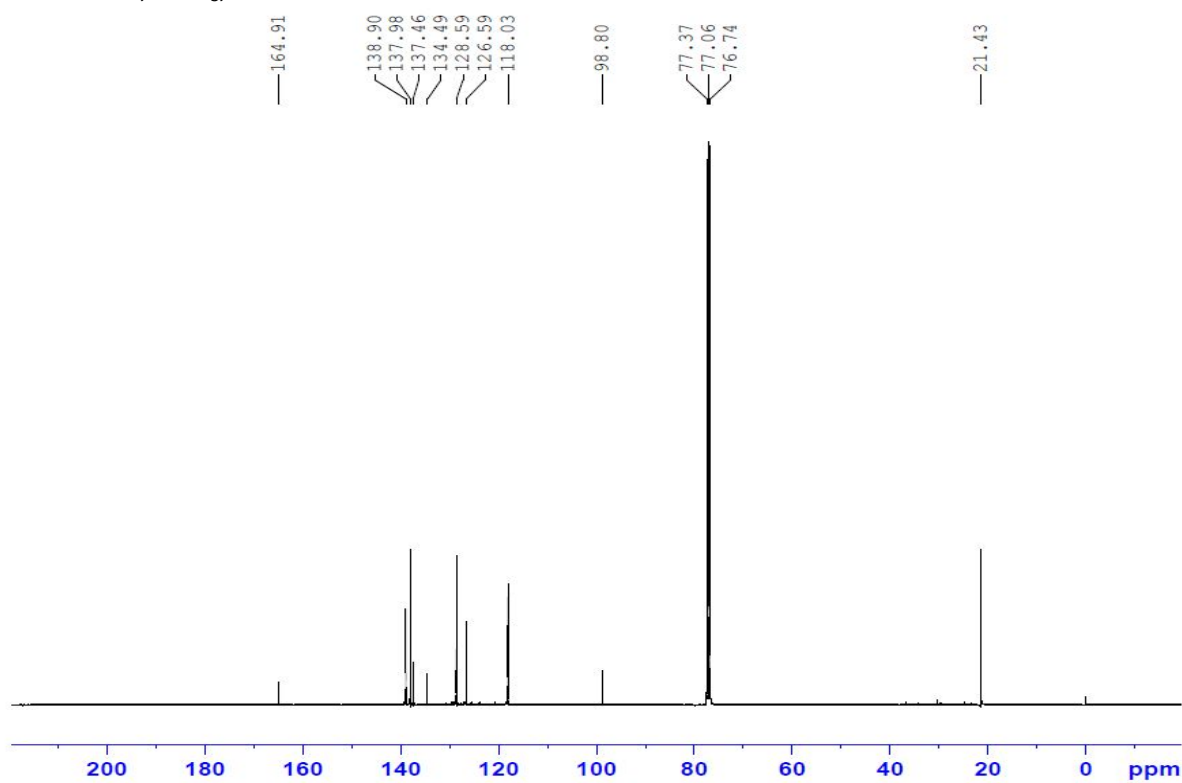

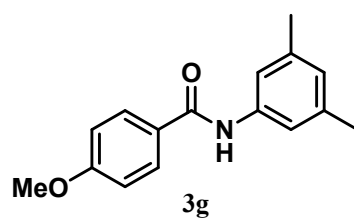

$^1\text{H}$  NMR,  $\text{CDCl}_3$ , 400 MHz

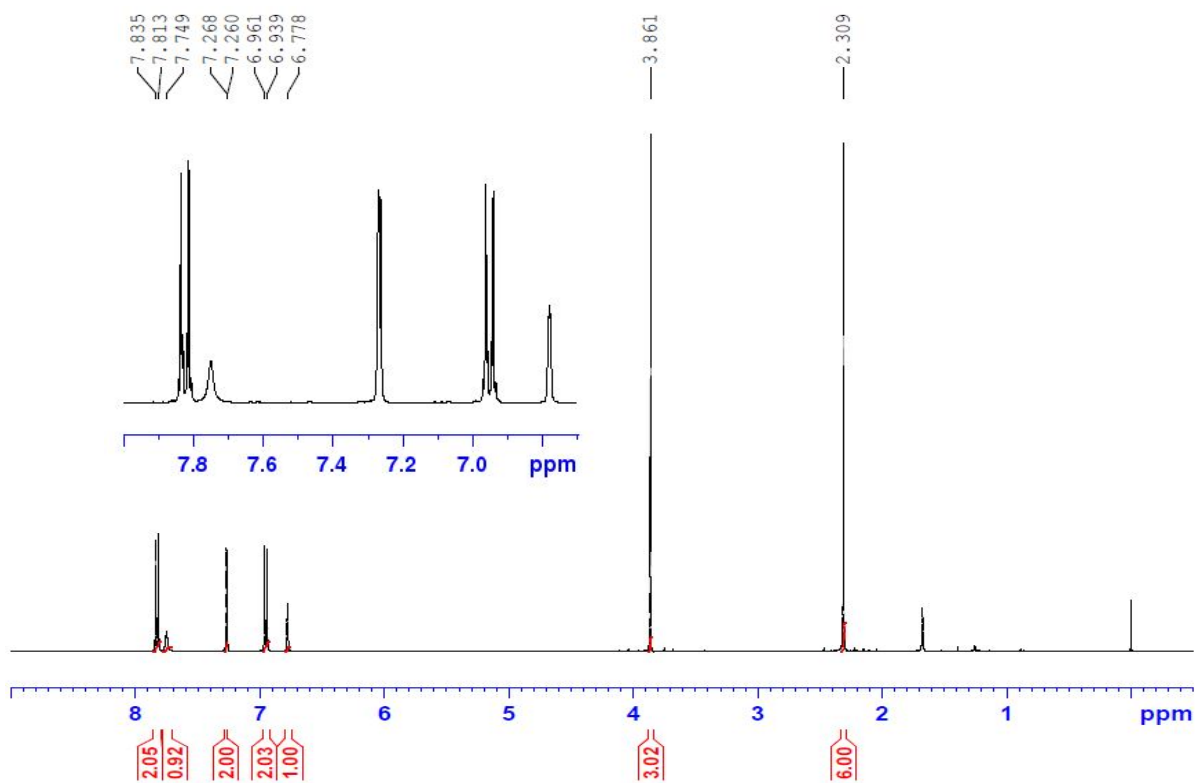

$^{13}\text{C}$  NMR,  $\text{CDCl}_3$ , 101 MHz

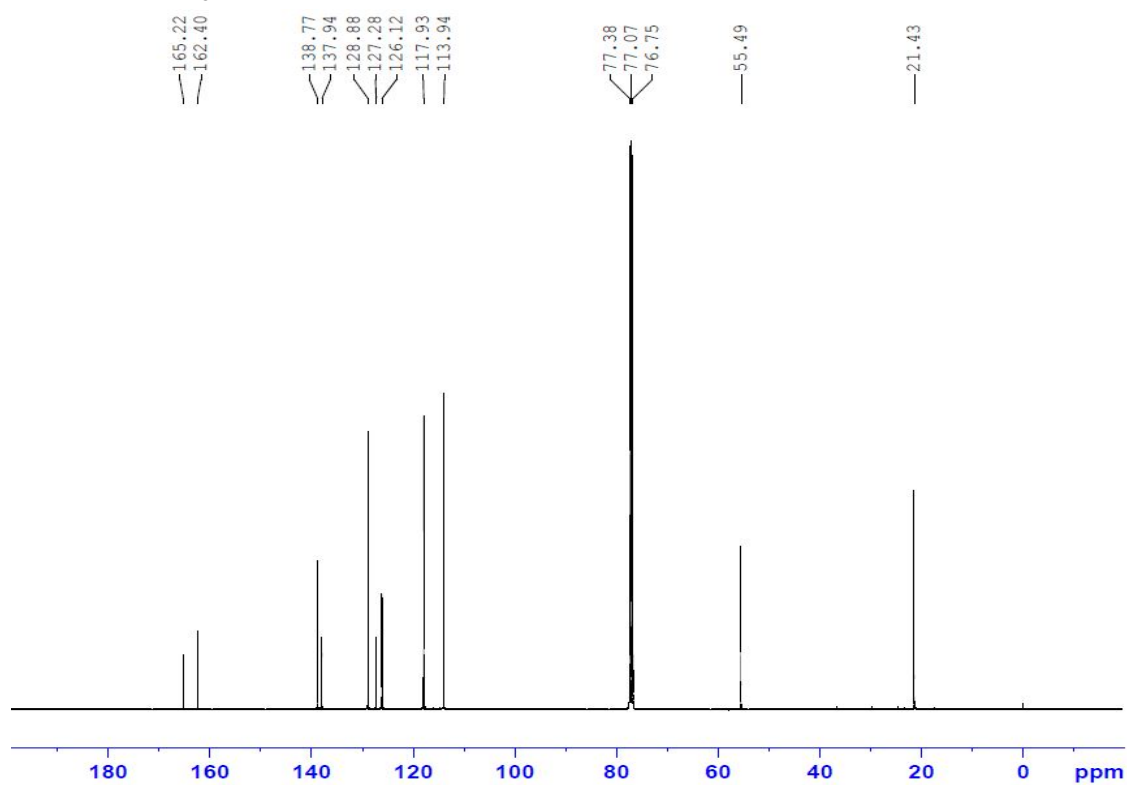

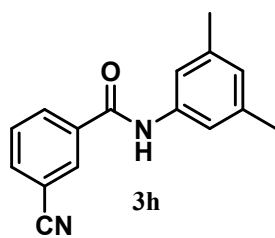

$^1\text{H}$  NMR,  $\text{CDCl}_3$ , 400 MHz

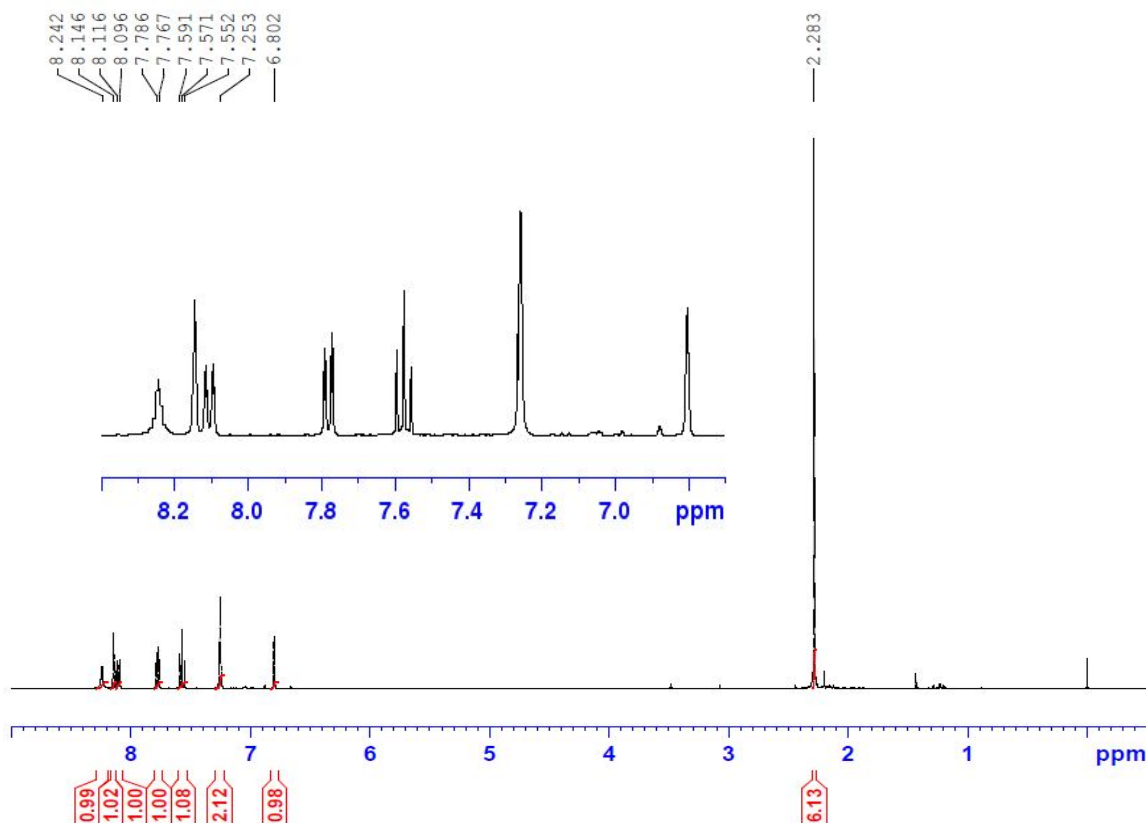

$^{13}\text{C}$  NMR,  $\text{CDCl}_3$ , 101 MHz

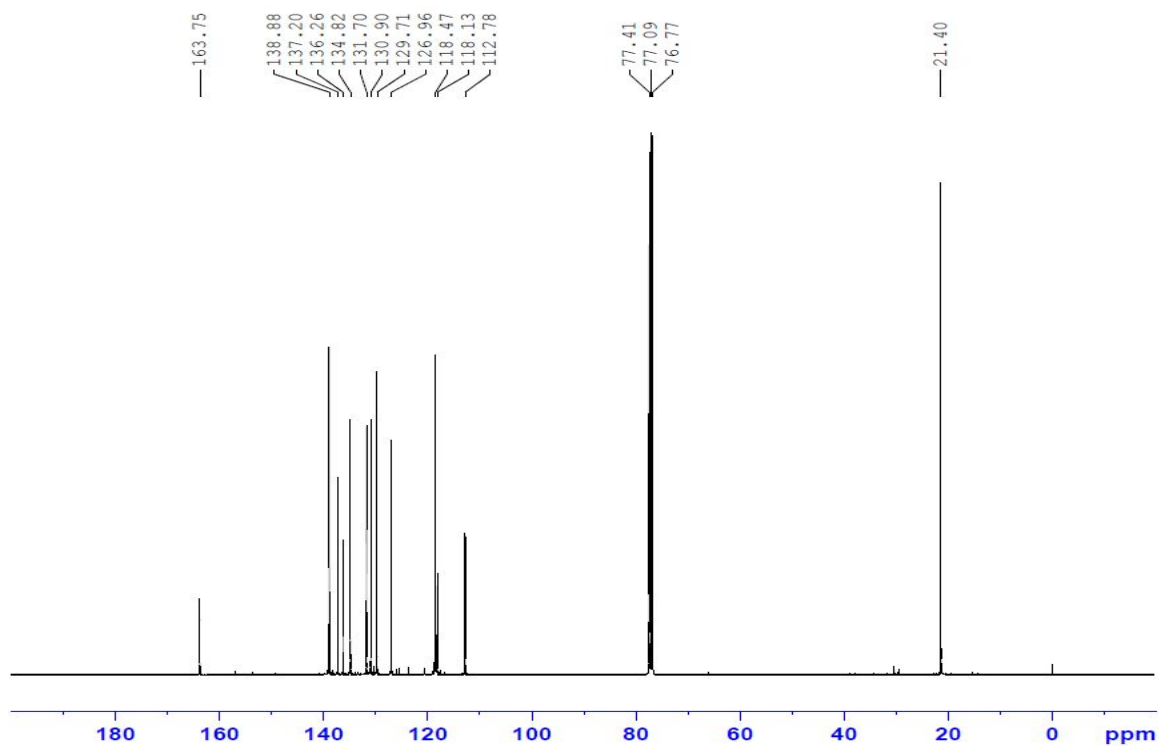



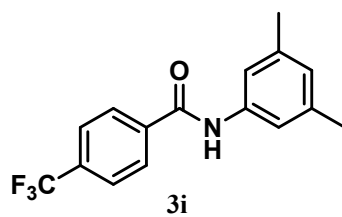

$^1\text{H}$  NMR,  $\text{CDCl}_3$ , 400 MHz

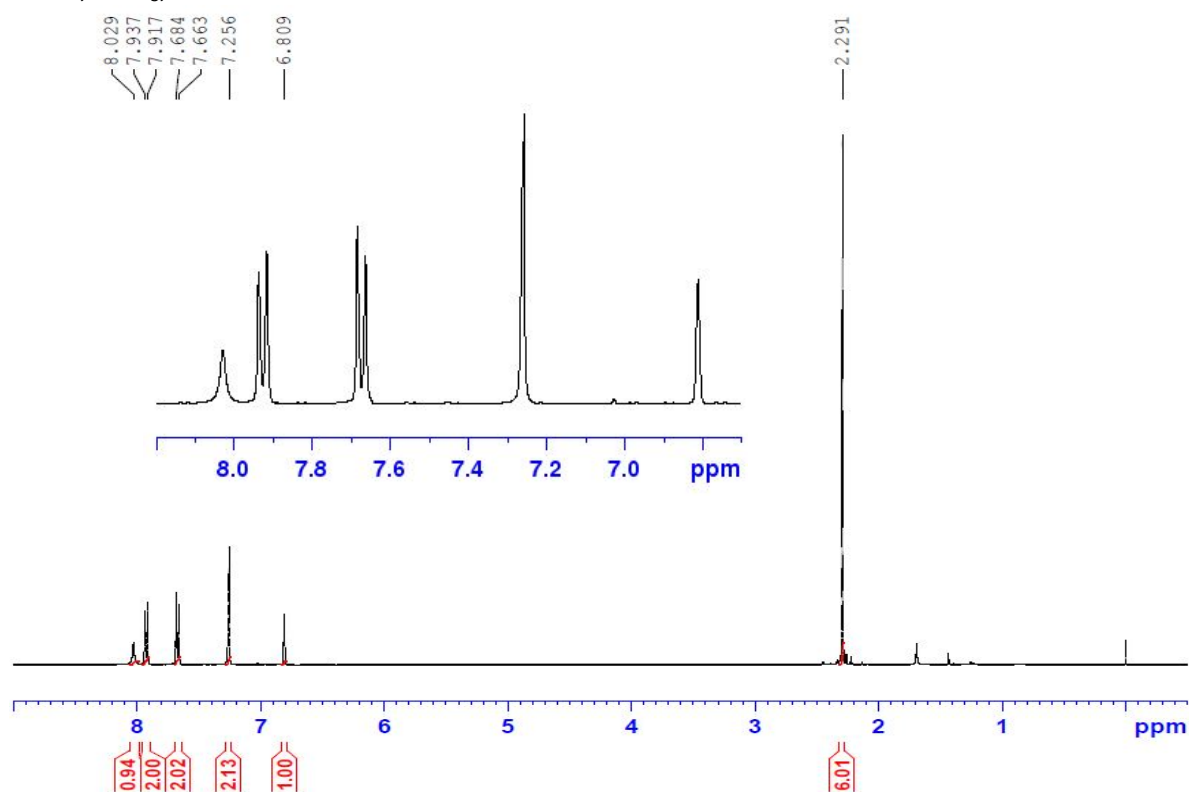

$^{13}\text{C}$  NMR,  $\text{CDCl}_3$ , 101 MHz

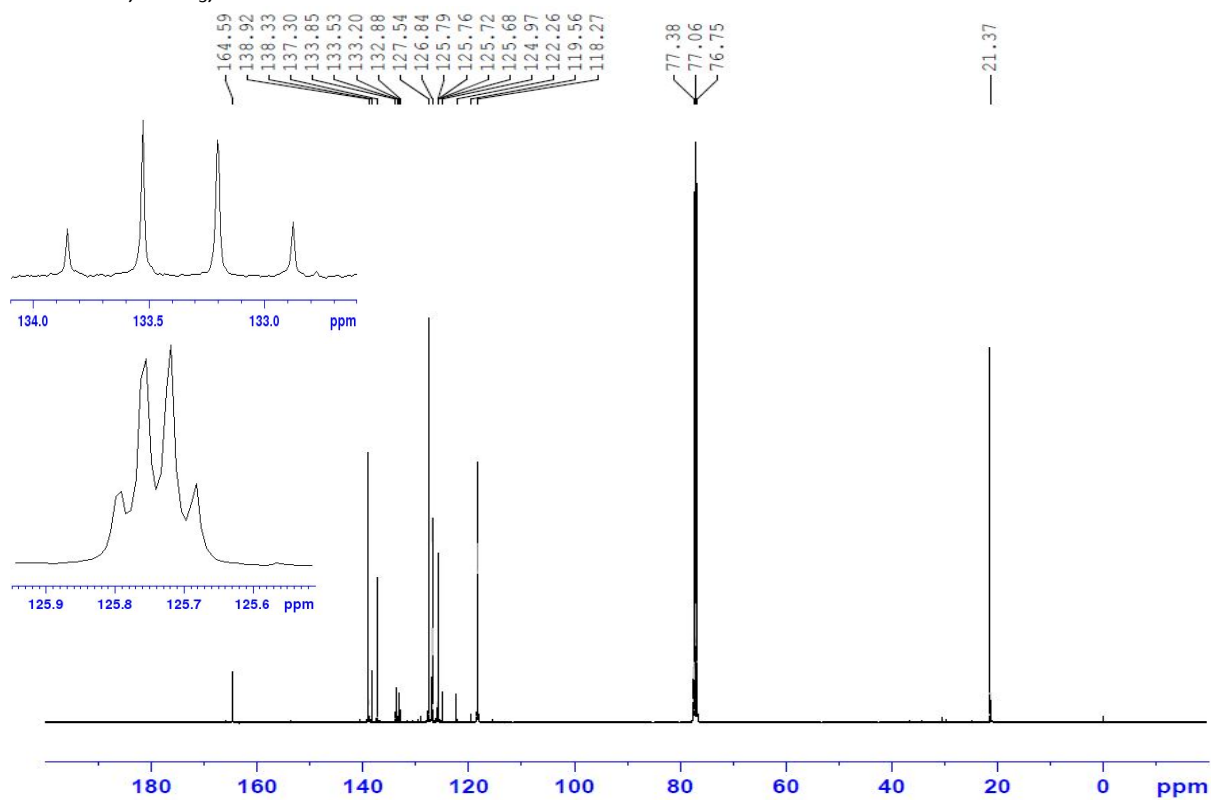

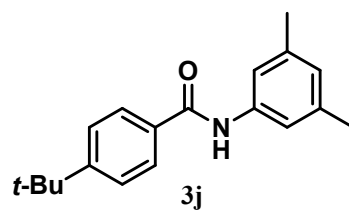

$^1\text{H}$  NMR,  $\text{CDCl}_3$ , 400 MHz

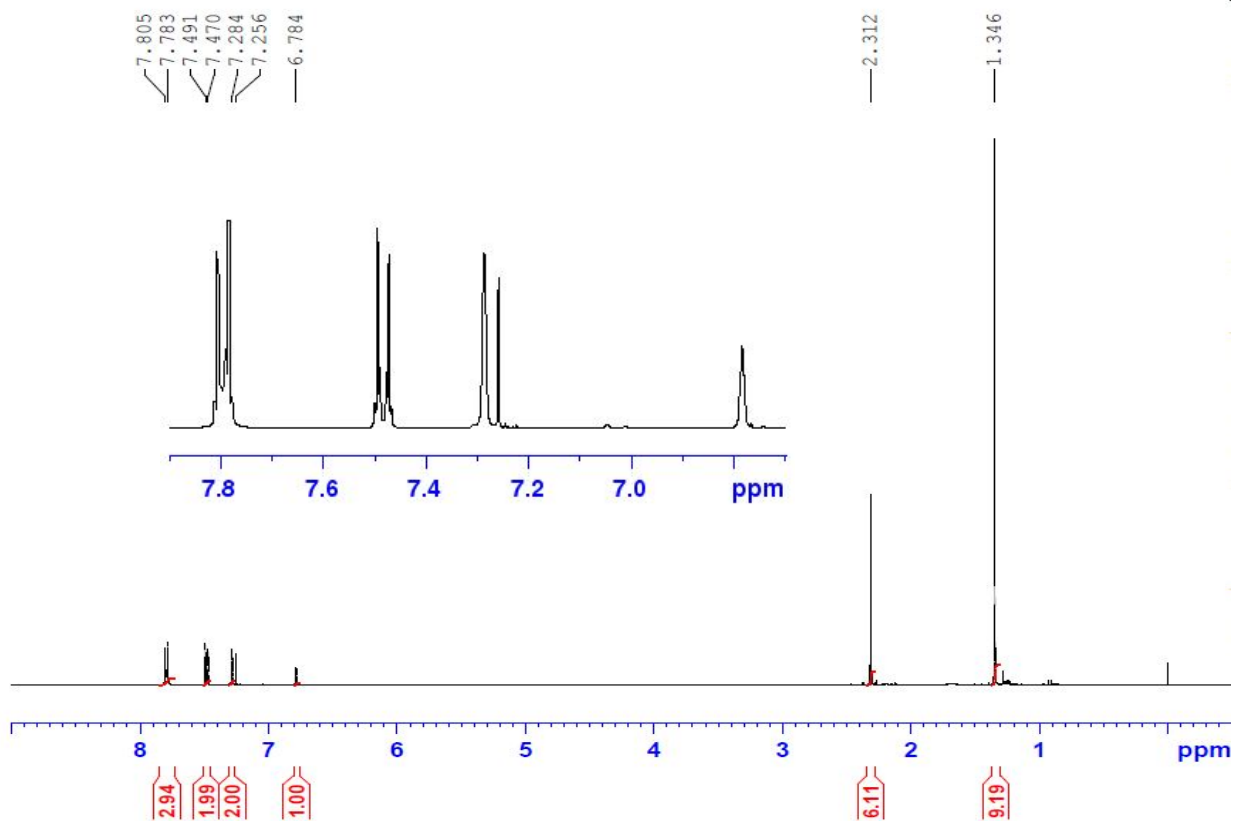

$^{13}\text{C}$  NMR,  $\text{CDCl}_3$ , 101 MHz

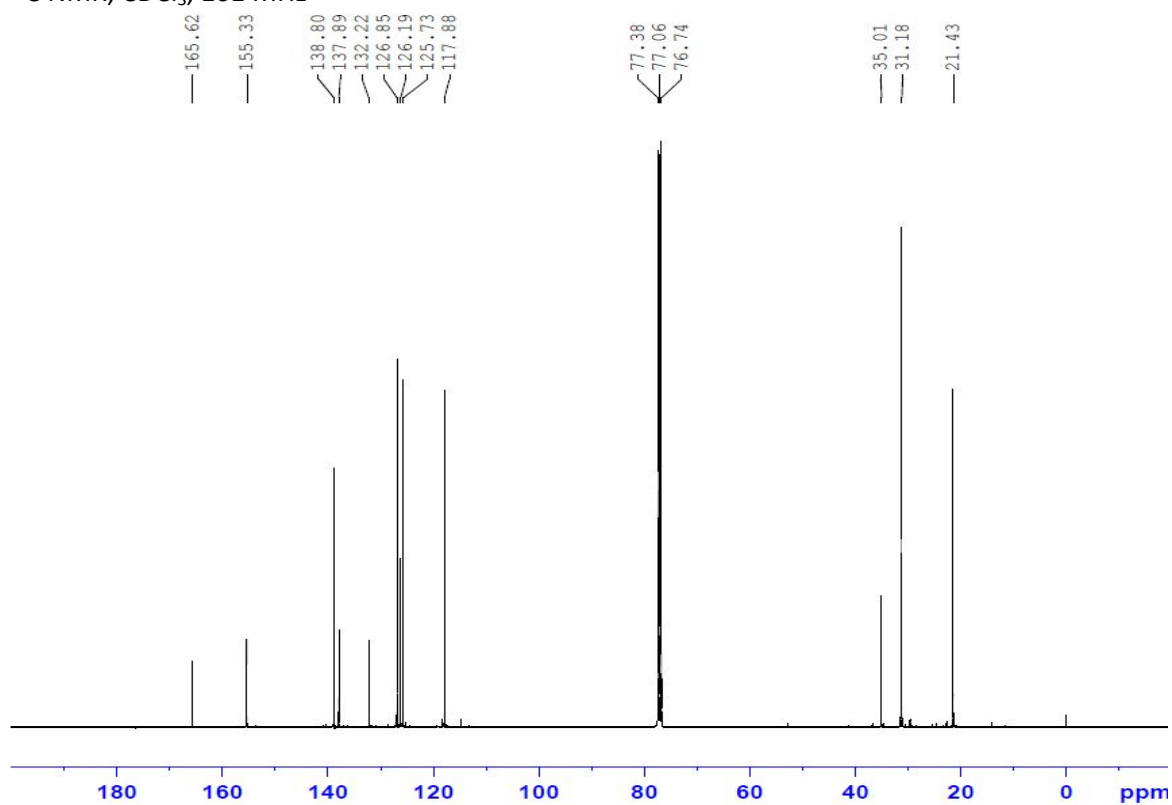

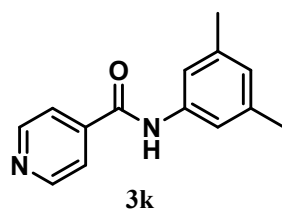

$^1\text{H}$  NMR,  $\text{CDCl}_3$ , 400 MHz

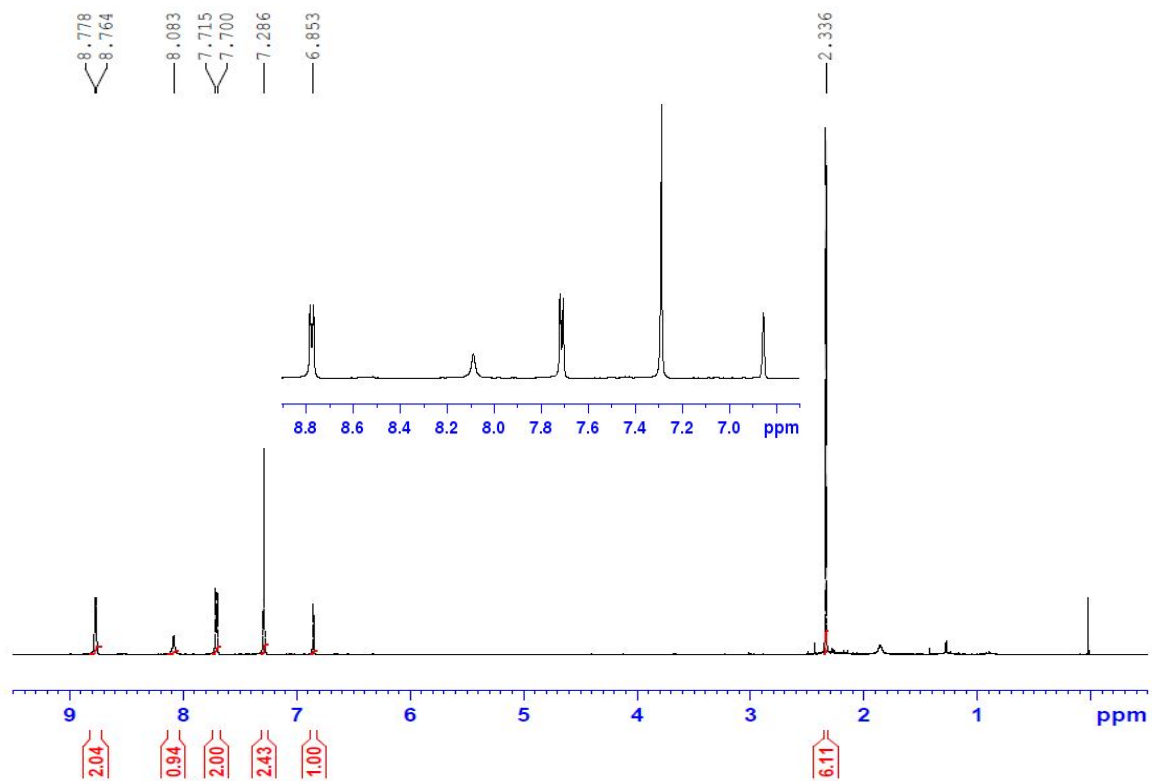

$^{13}\text{C}$  NMR,  $\text{CDCl}_3$ , 101 MHz

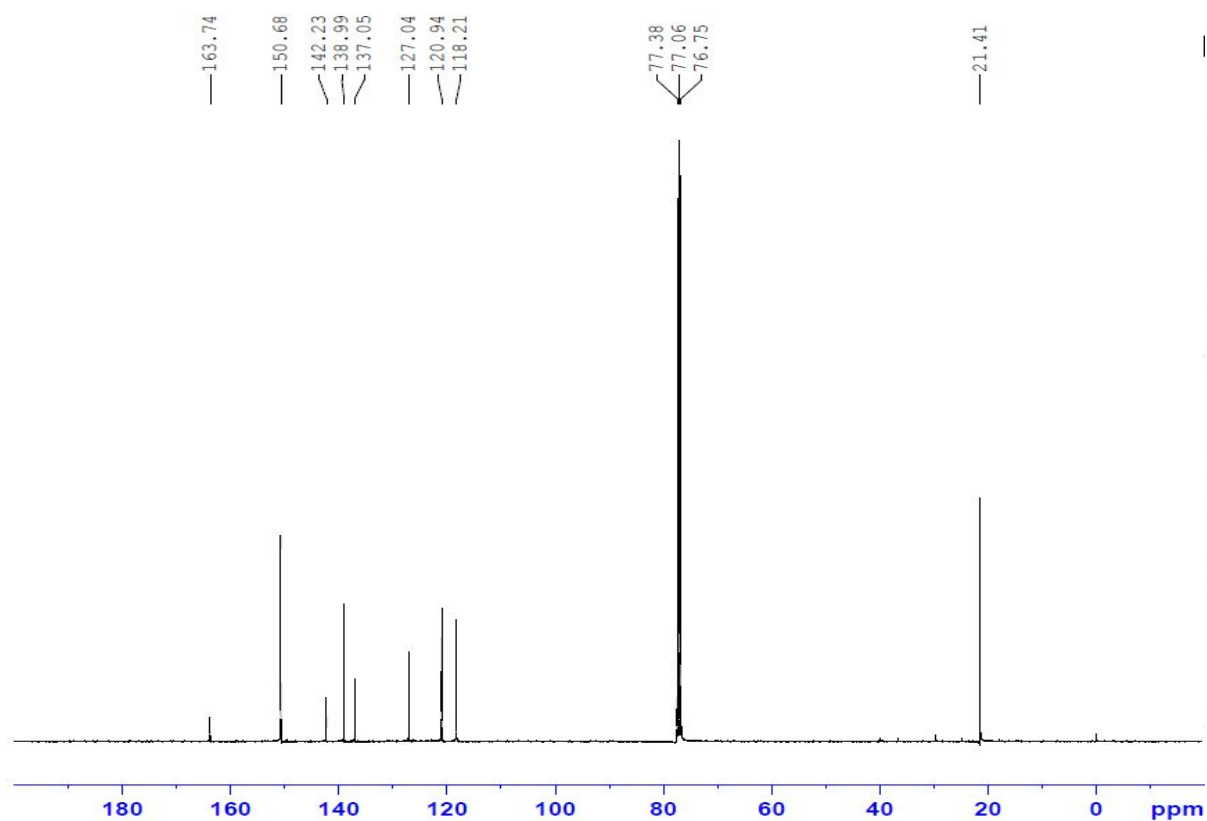

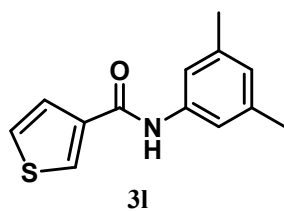

$^1\text{H}$  NMR,  $\text{CDCl}_3$ , 400 MHz

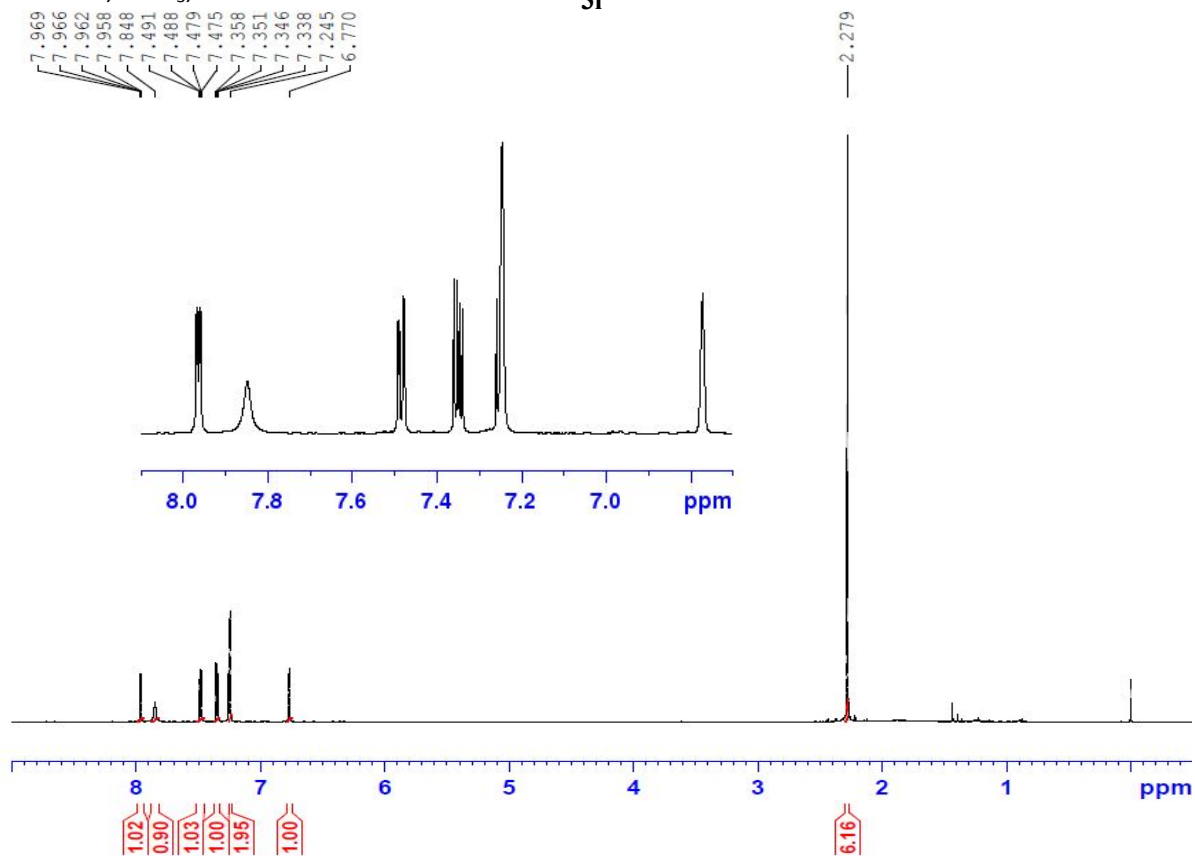

$^{13}\text{C}$  NMR,  $\text{CDCl}_3$ , 101 MHz

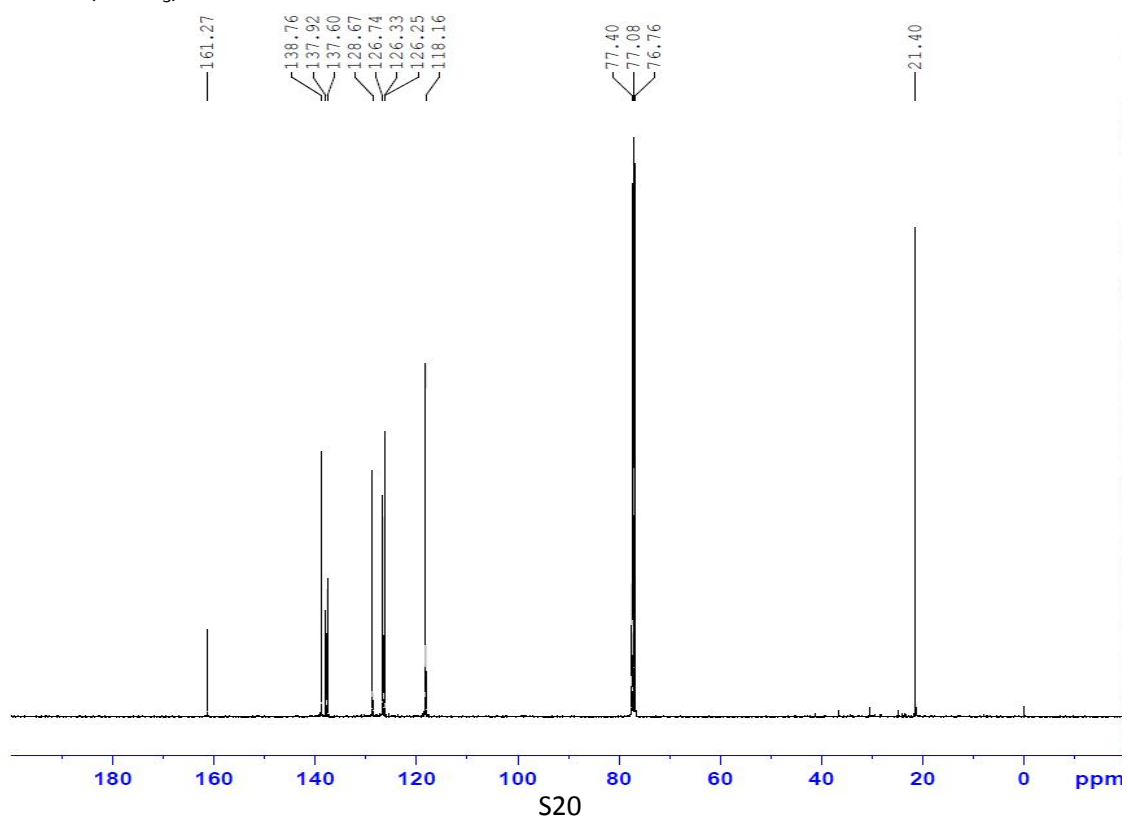

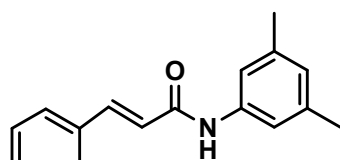

3m

$^1\text{H}$  NMR,  $\text{CDCl}_3$ , 400 MHz

7.753  
7.714  
7.609  
7.502  
7.496  
7.487  
7.478  
7.357  
7.349  
7.341  
7.273  
7.257  
6.763  
6.593  
6.554

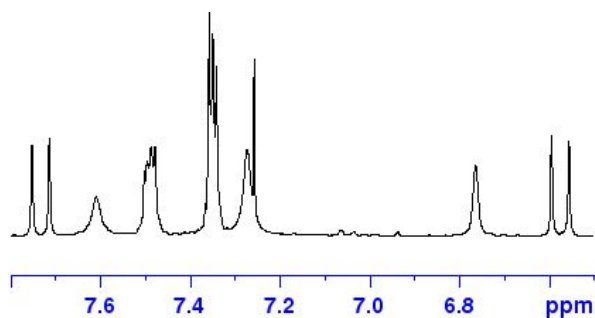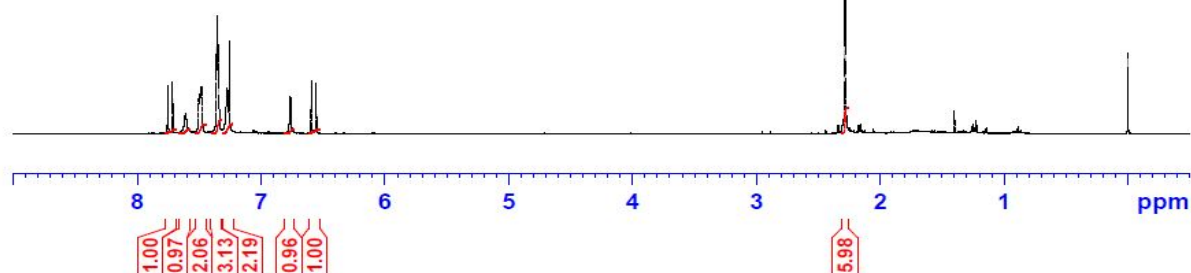

$^{13}\text{C}$  NMR,  $\text{CDCl}_3$ , 101 MHz

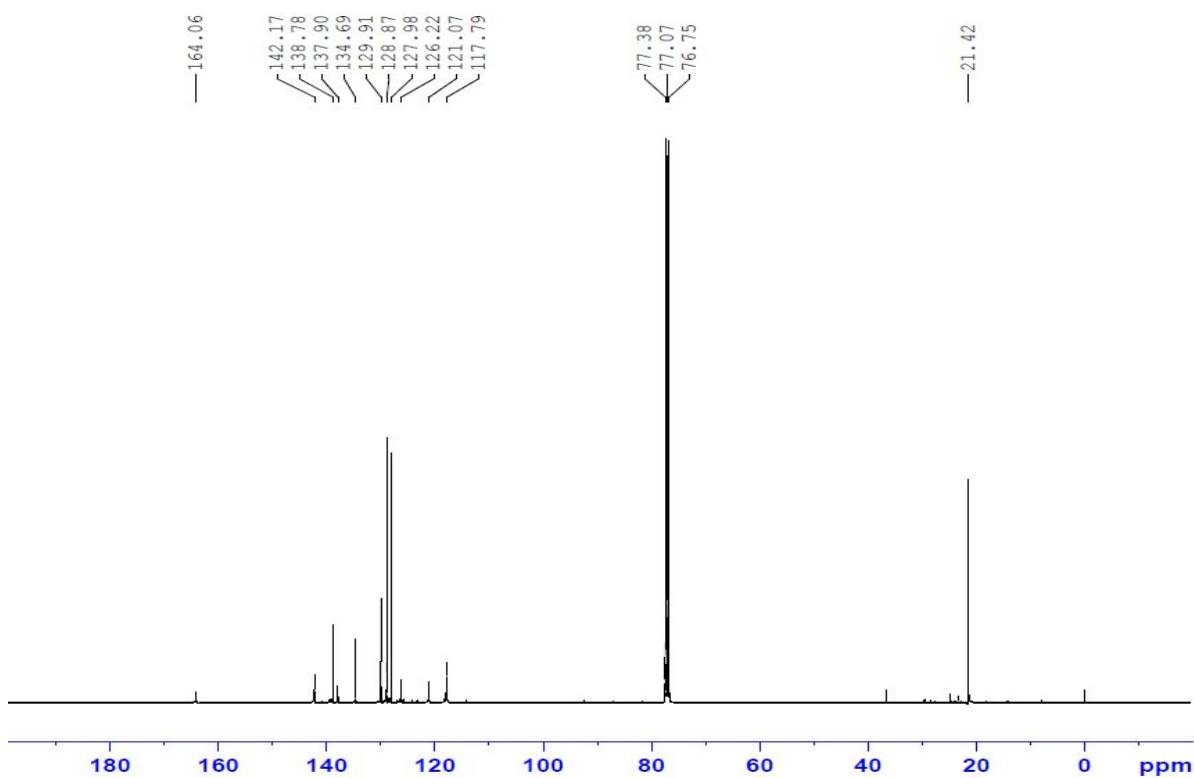

$^1\text{H}$  NMR,  $\text{CDCl}_3$ , 400 MHz

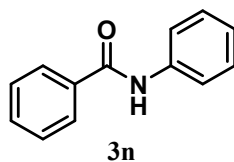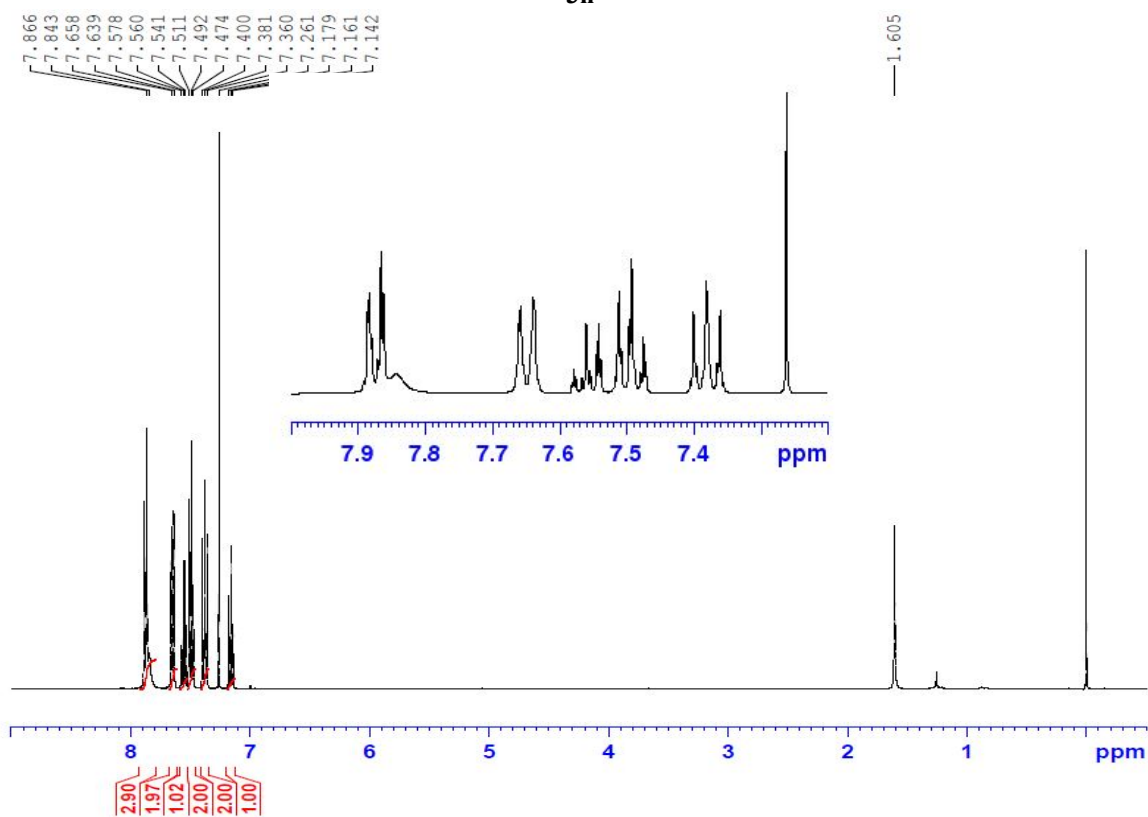

$^{13}\text{C}$  NMR,  $\text{CDCl}_3$ , 101 MHz

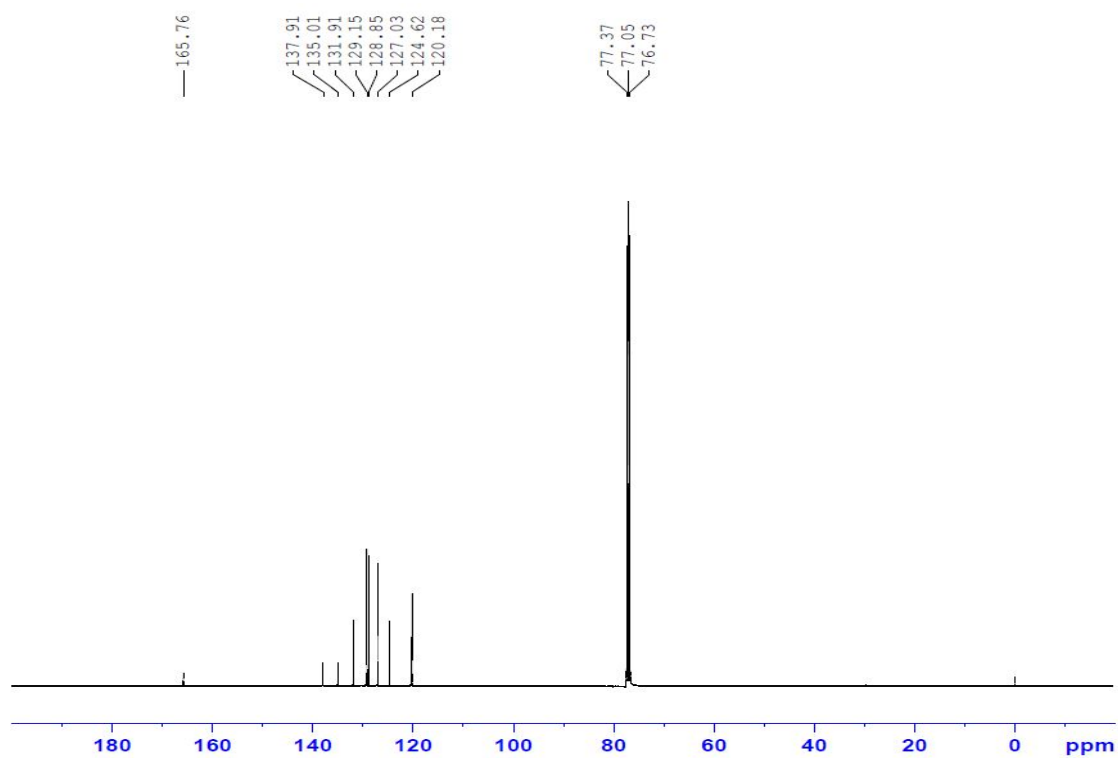

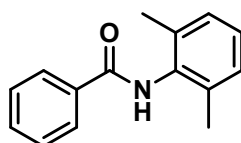

3o

$^1\text{H}$  NMR,  $\text{CDCl}_3$ , 400 MHz

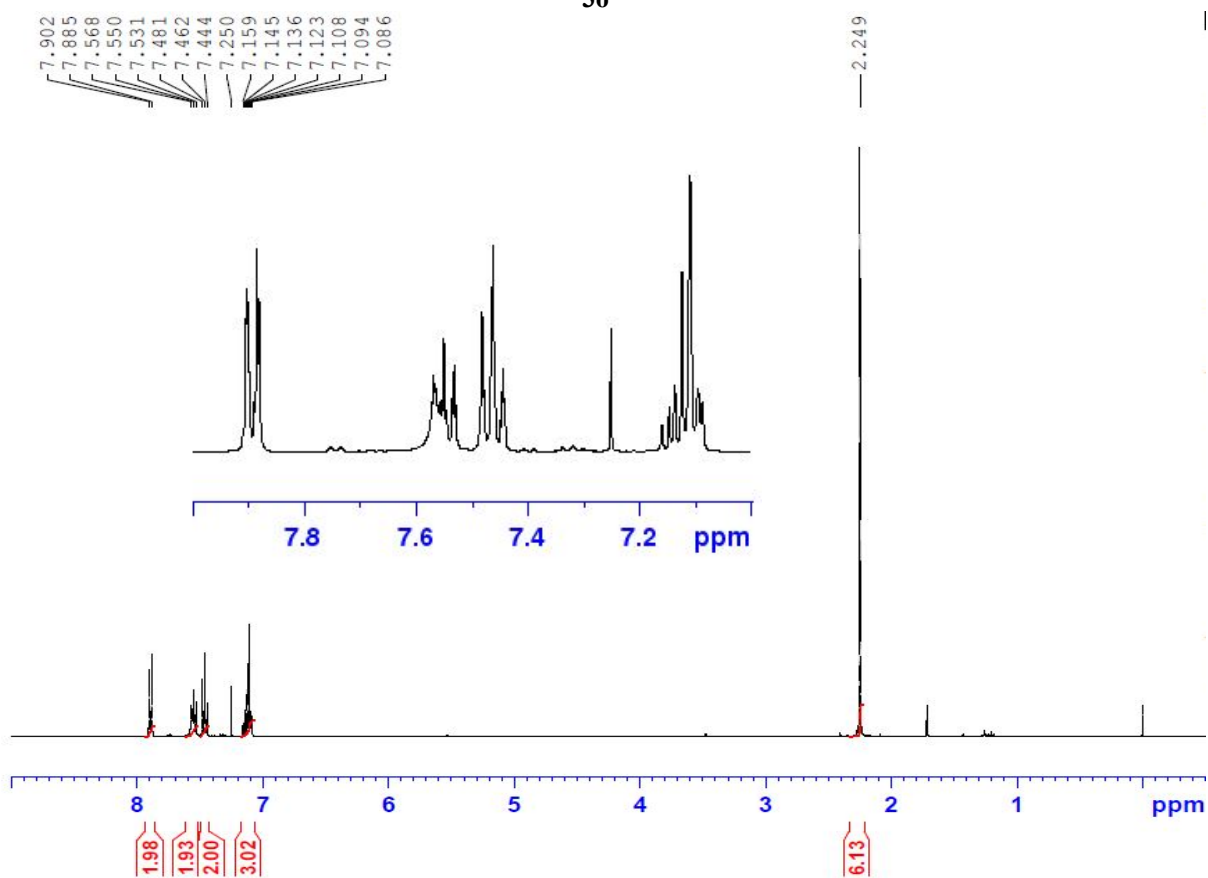

$^{13}\text{C}$  NMR,  $\text{CDCl}_3$ , 101 MHz

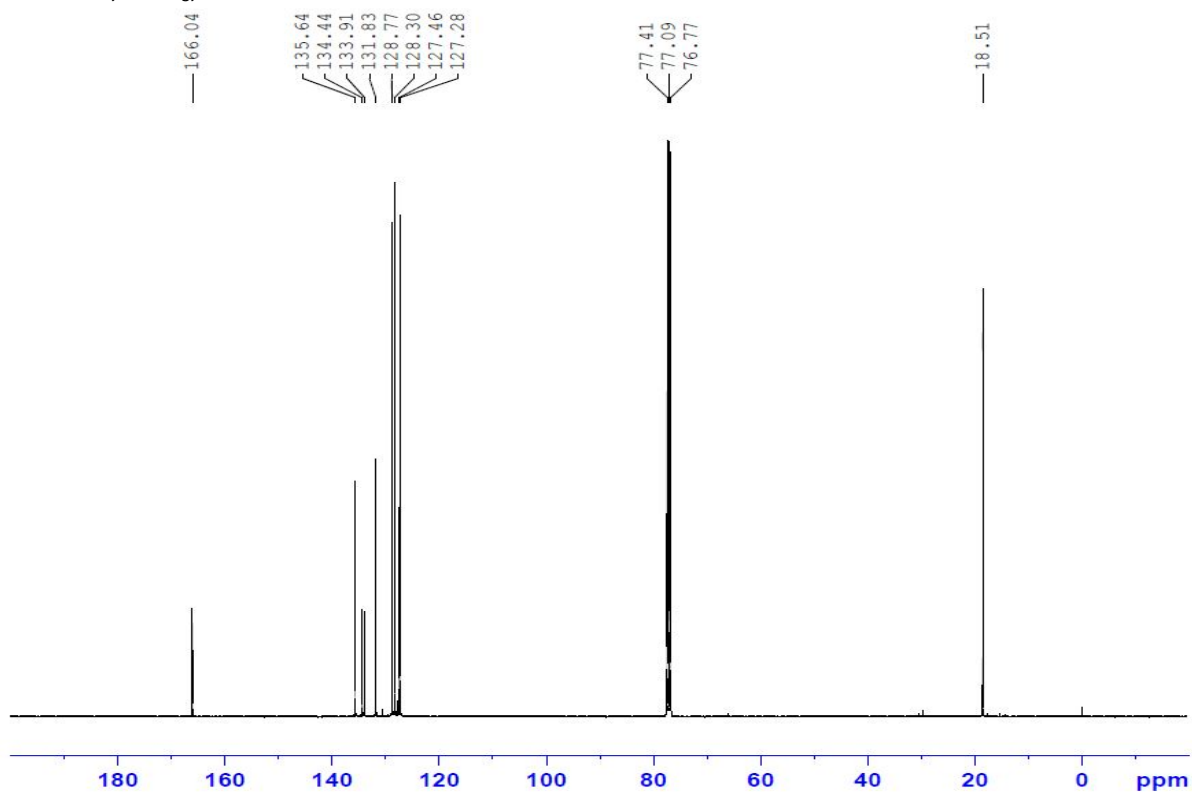

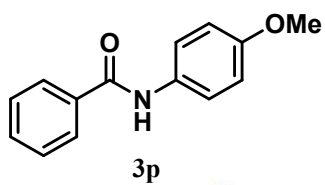

$^1\text{H}$  NMR,  $\text{CDCl}_3$ , 400 MHz

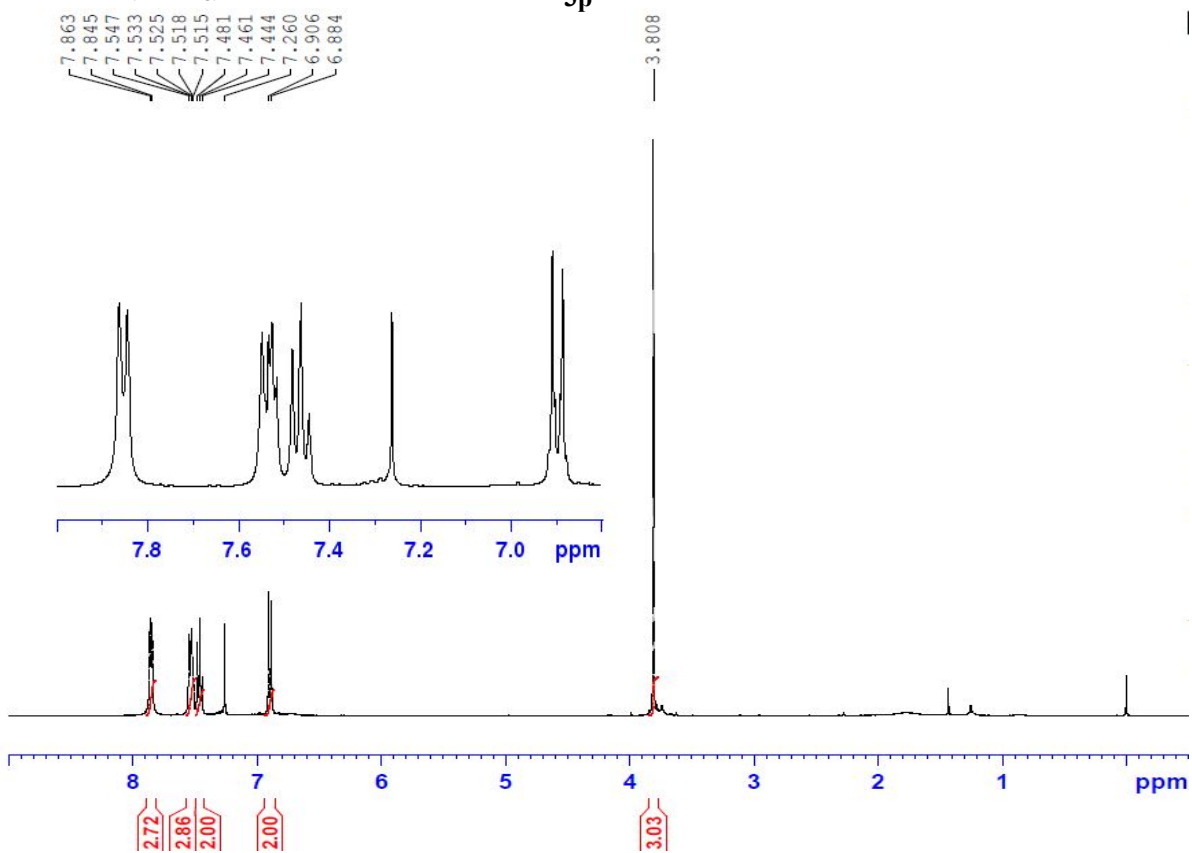

$^{13}\text{C}$  NMR,  $\text{CDCl}_3$ , 101 MHz

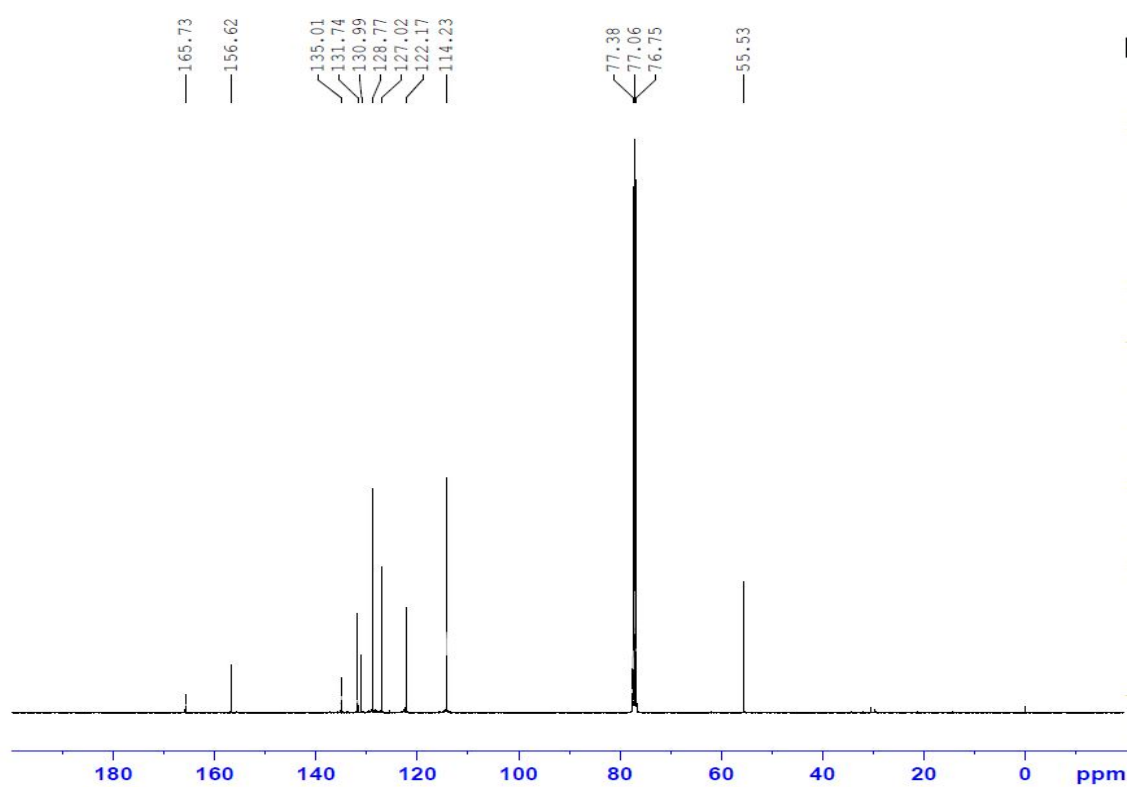



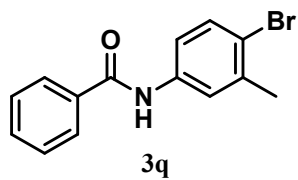

$^1\text{H}$  NMR,  $\text{CDCl}_3$ , 400 MHz

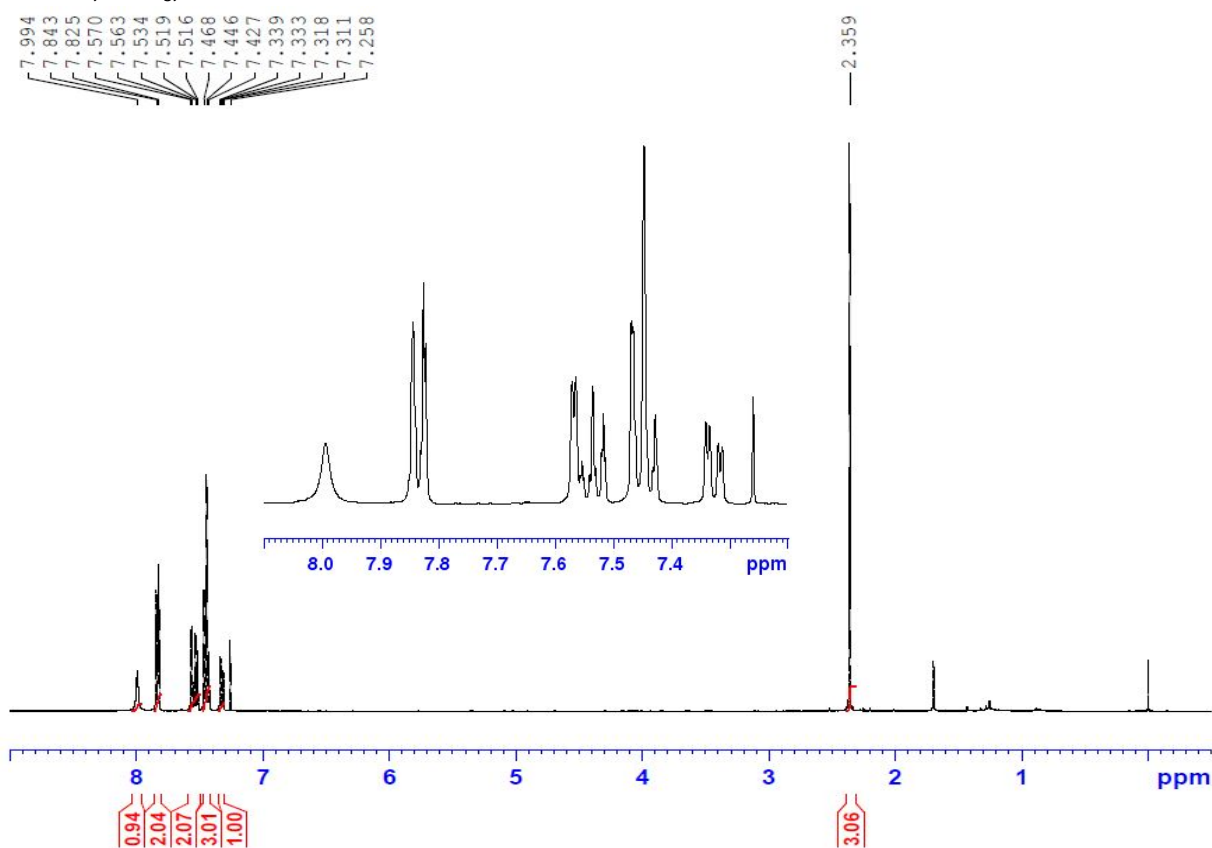

$^{13}\text{C}$  NMR,  $\text{CDCl}_3$ , 101 MHz

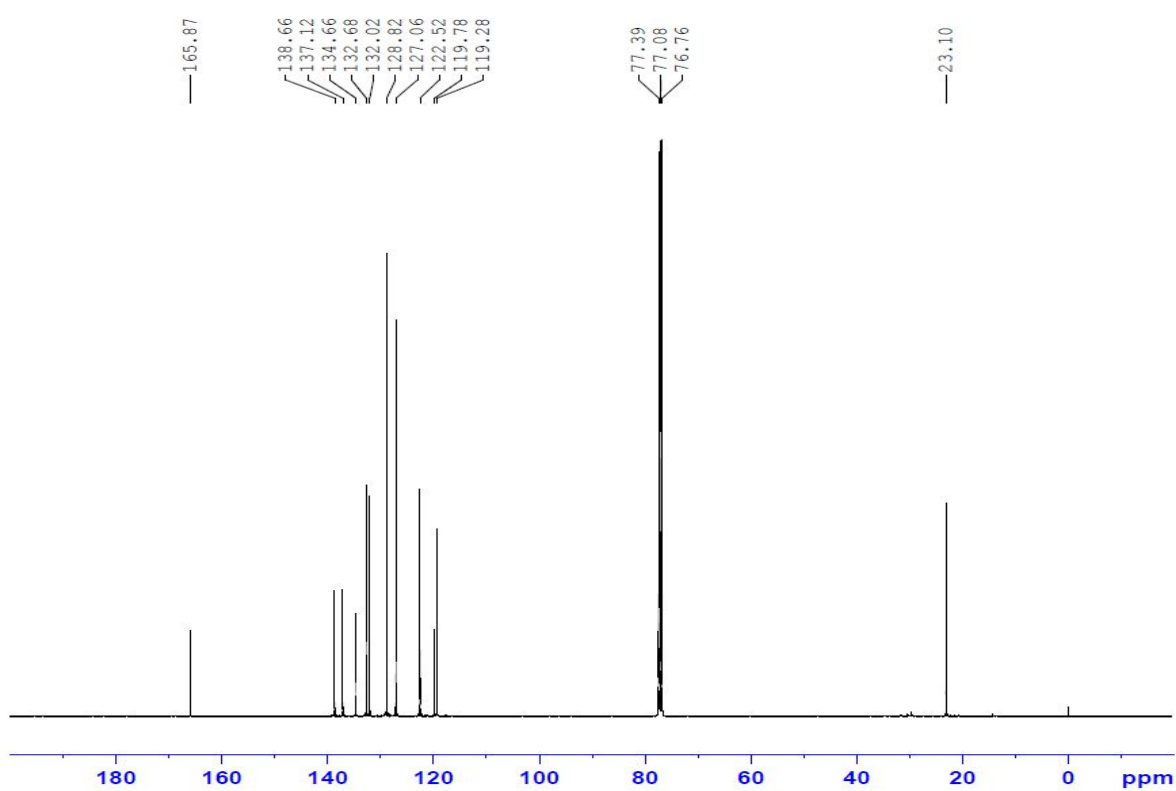

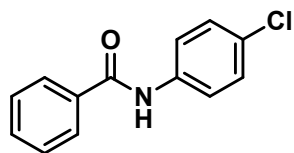

3r

$^1\text{H}$  NMR,  $\text{CDCl}_3$ , 400 MHz

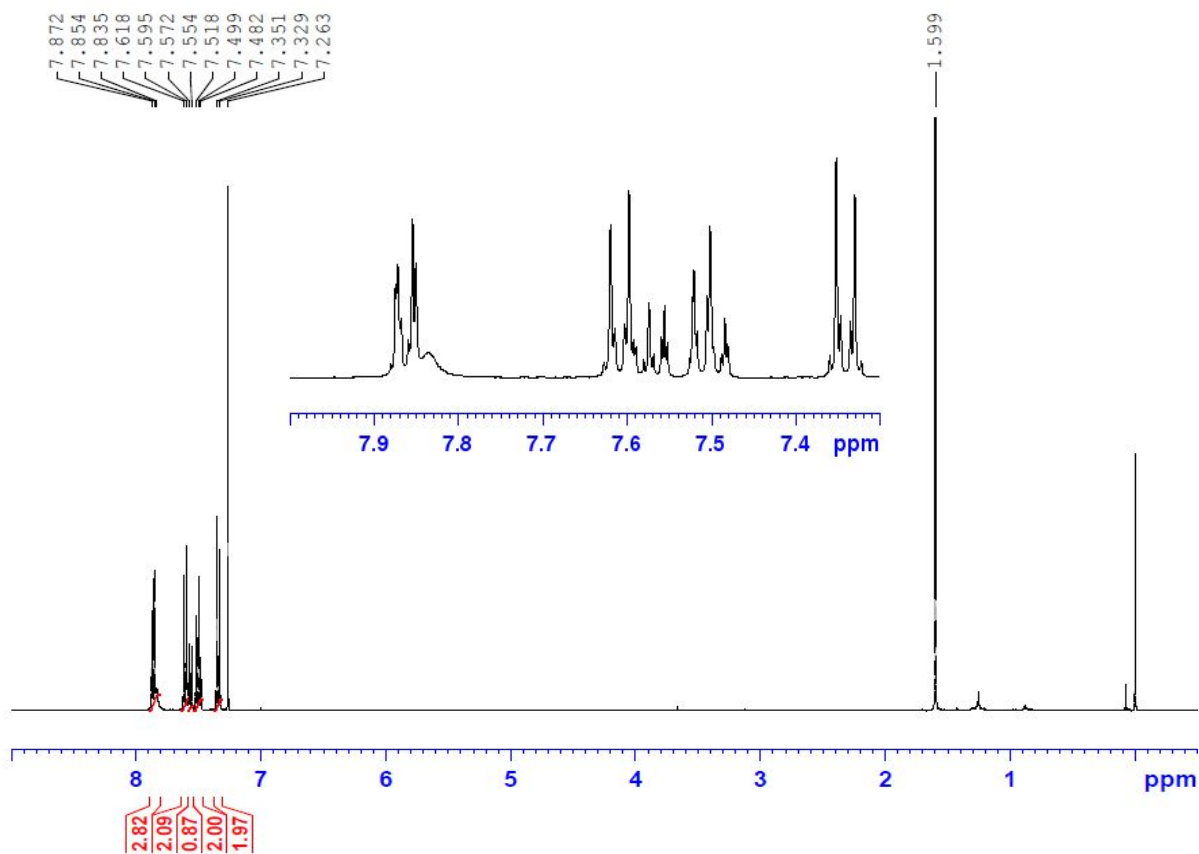

$^{13}\text{C}$  NMR,  $\text{CDCl}_3$ , 101 MHz

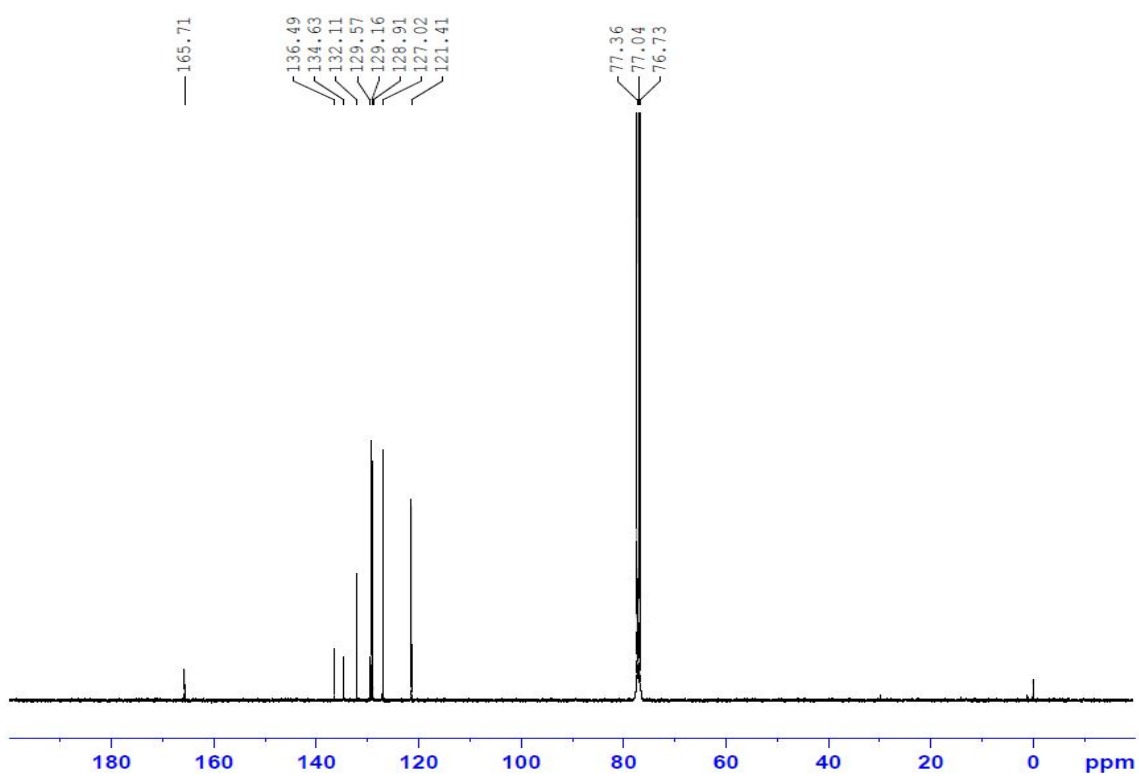

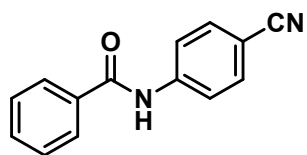

3s

$^1\text{H}$  NMR,  $\text{CDCl}_3$ , 400 MHz

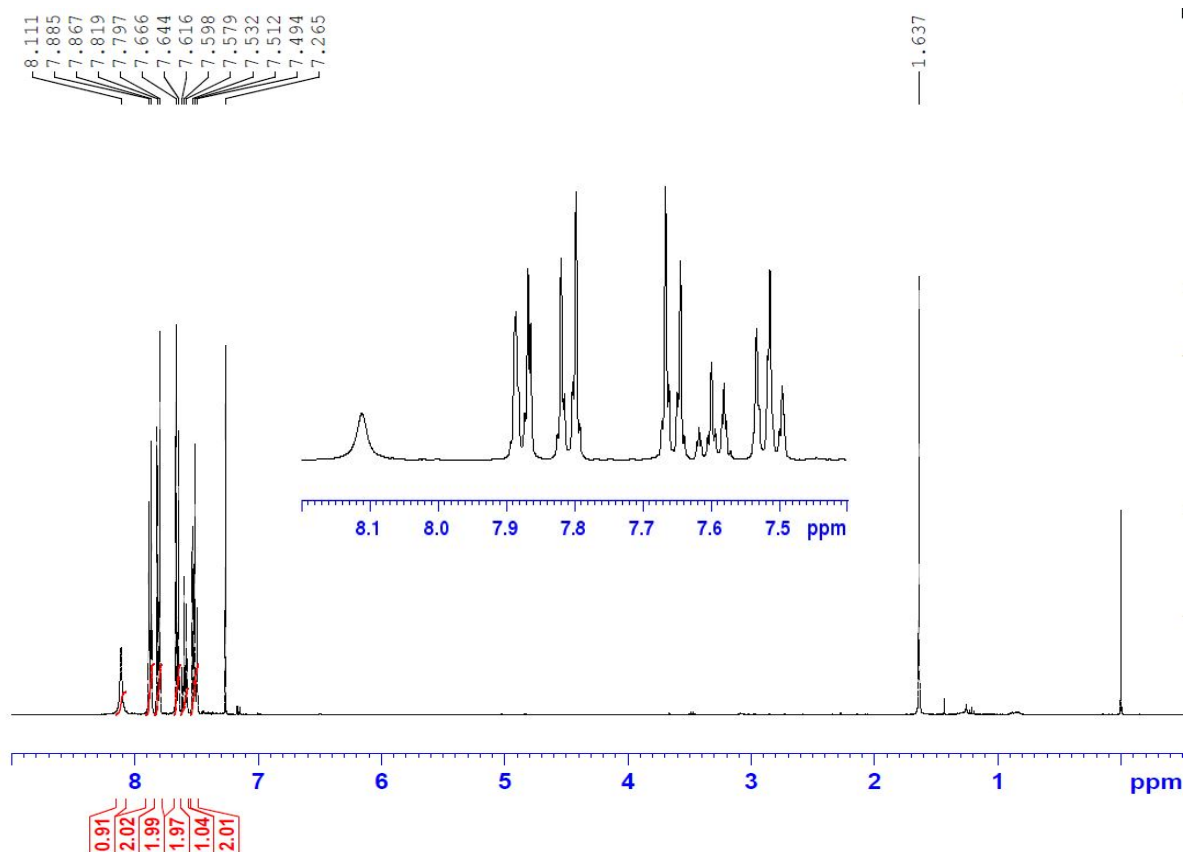

$^{13}\text{C}$  NMR,  $\text{CDCl}_3$ , 101 MHz

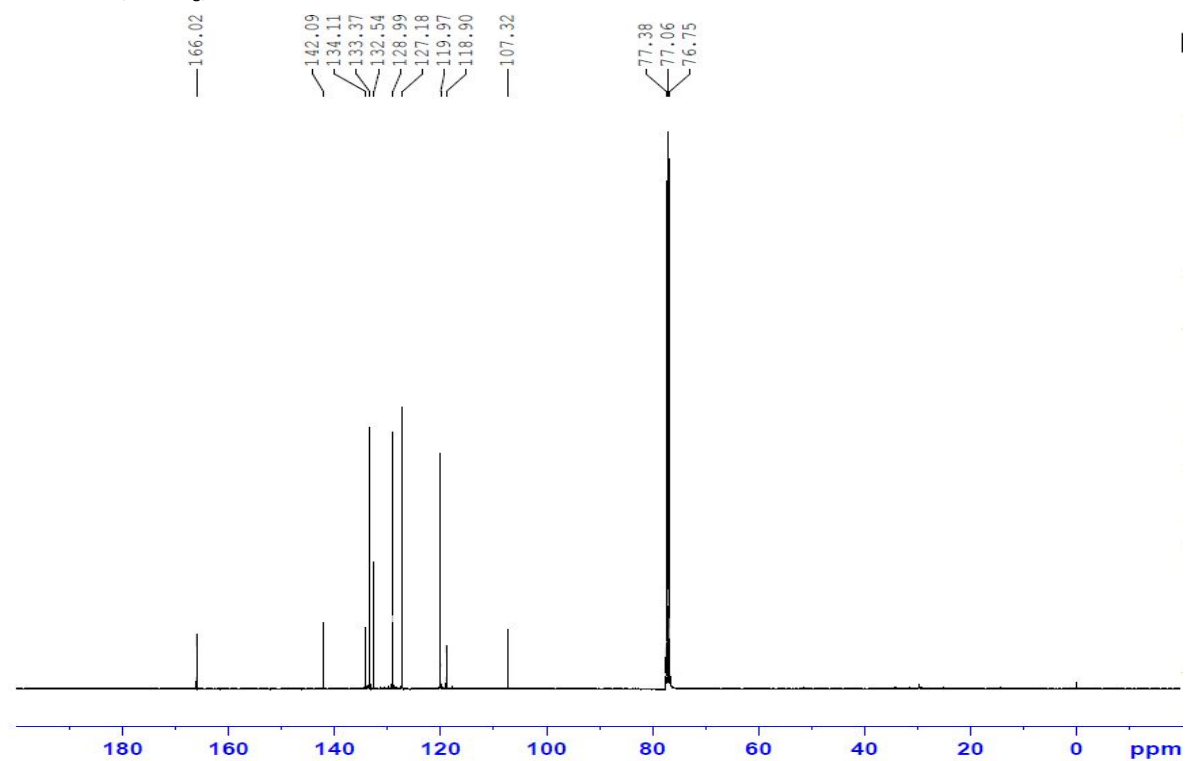

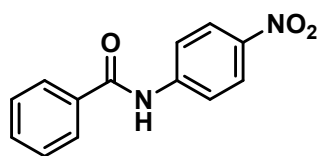

3t

$^1\text{H}$  NMR,  $\text{d}_6\text{-DMSO}$ , 400 MHz

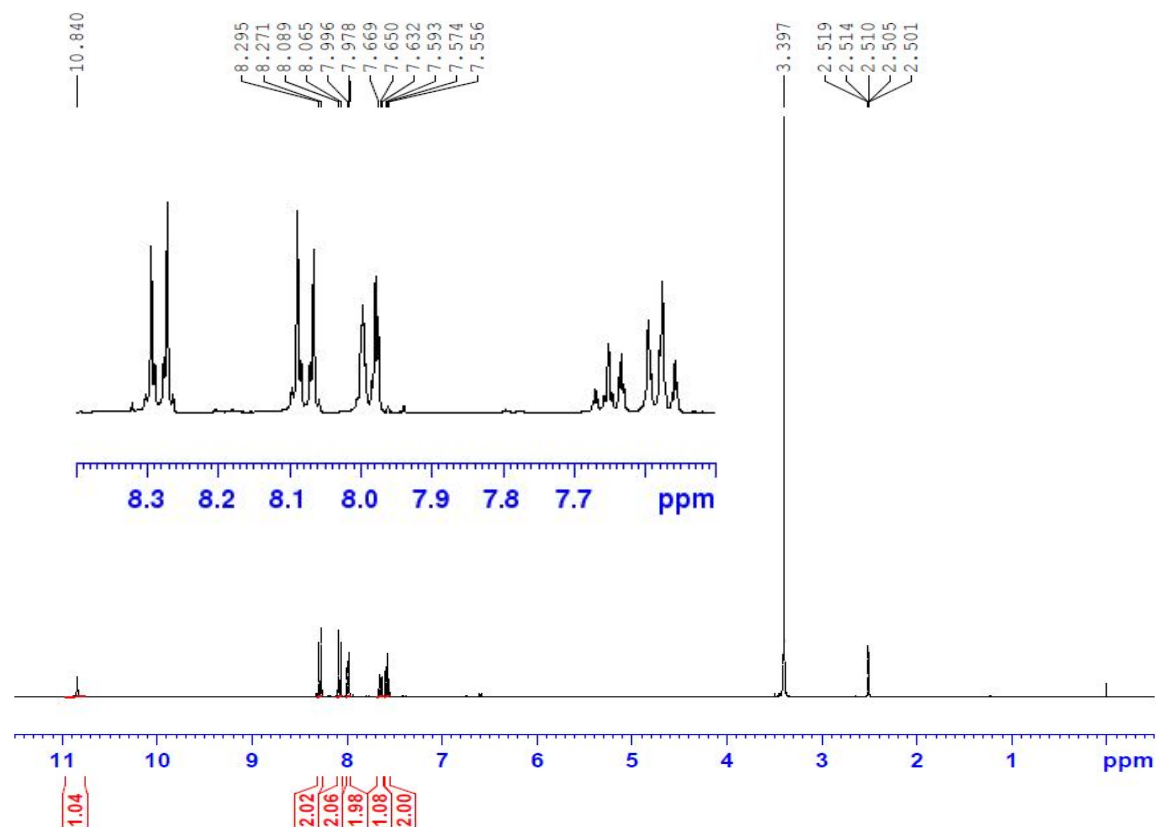

$^{13}\text{C}$  NMR,  $\text{d}_6\text{-DMSO}$ , 101 MHz

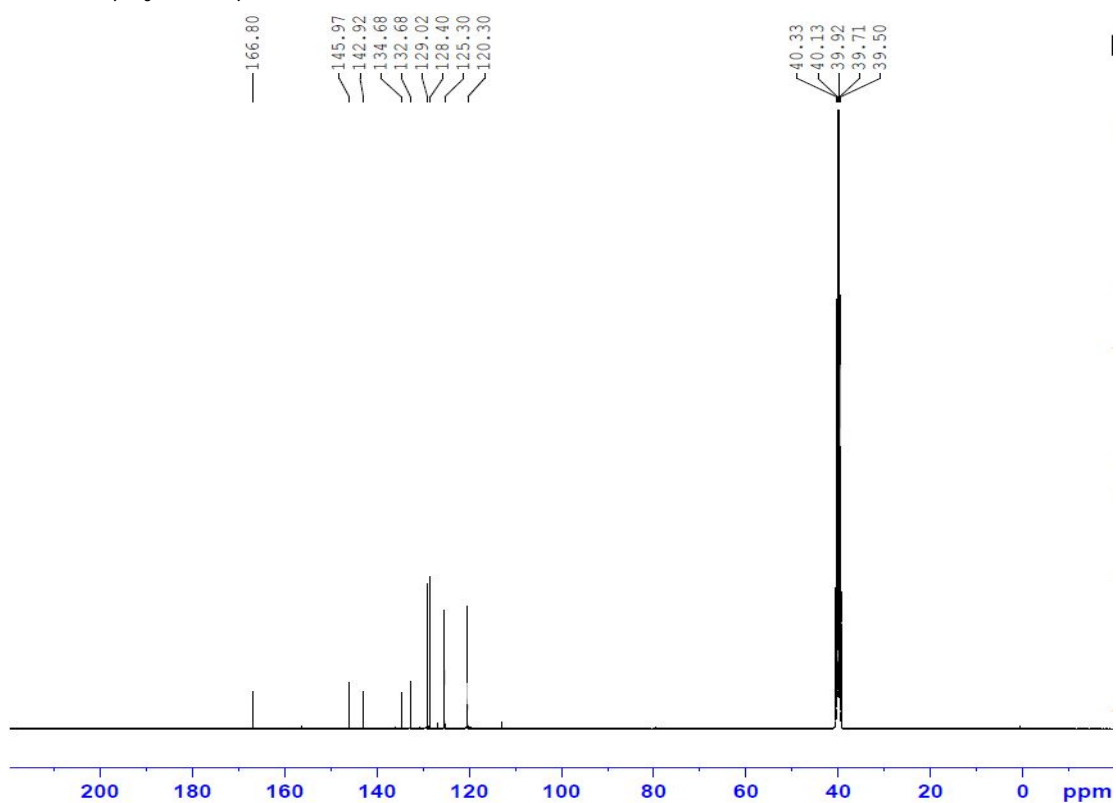

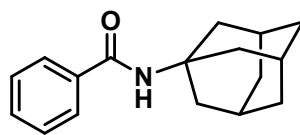

**3u**

$^1\text{H}$  NMR,  $\text{CDCl}_3$ , 400 MHz

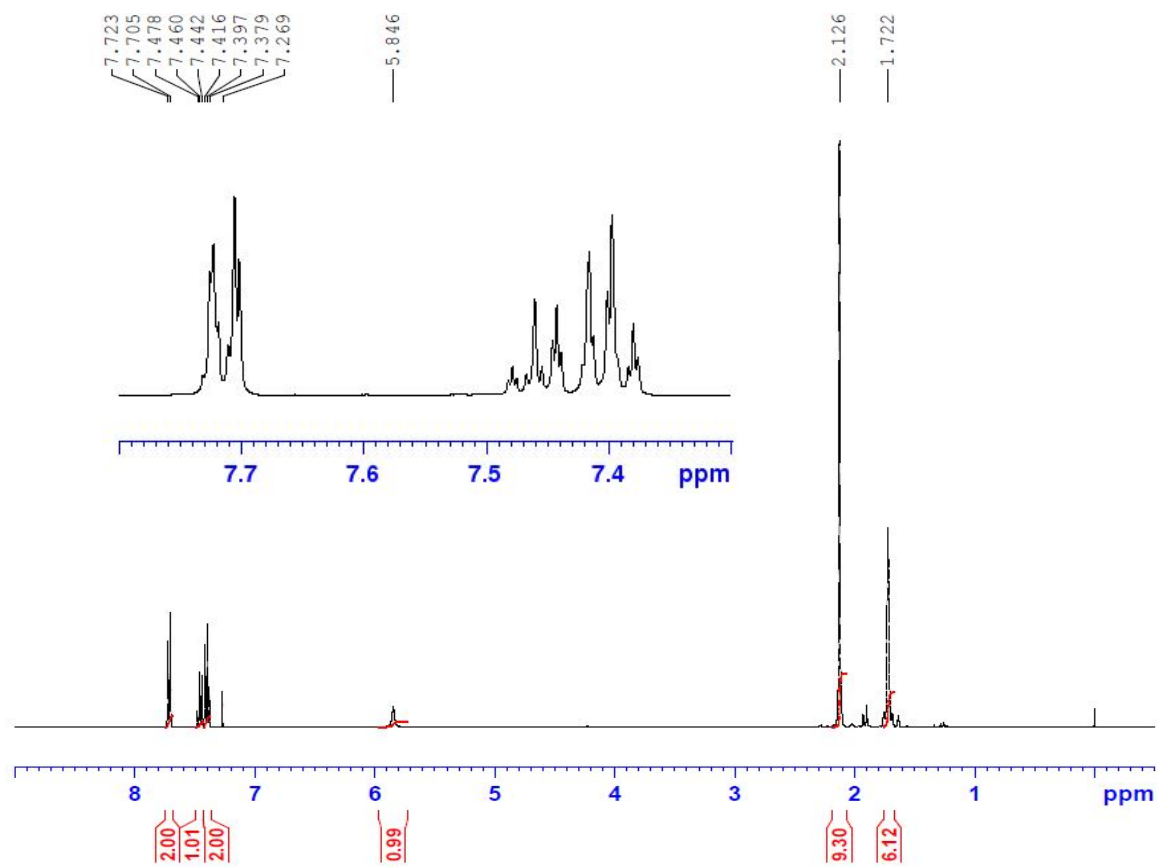

$^{13}\text{C}$  NMR,  $\text{CDCl}_3$ , 101 MHz

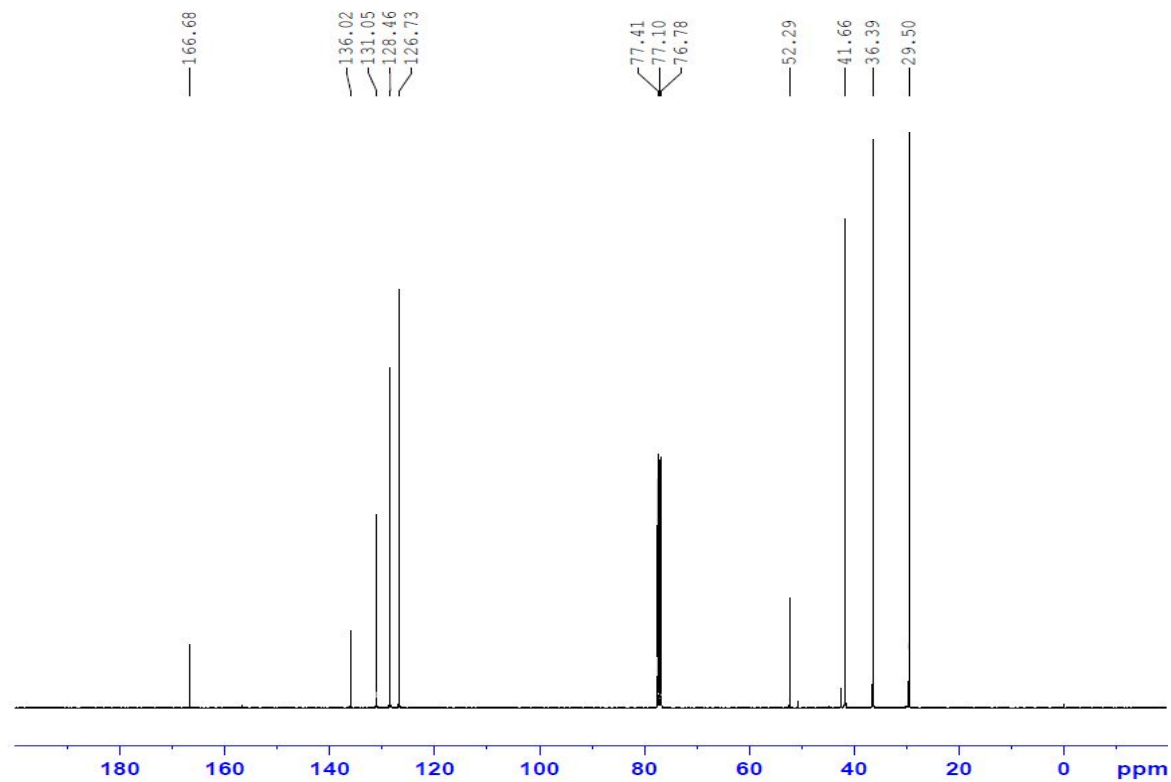

Supplement: c5gc01374g1.pdf [file c5gc01374g1.pdf]
